# Supplementary material for: HIA: a genome mapper using hybrid index-based sequence alignment
Source: PubMed Central journal article supplement (PMC4688996; doi:10.1186/s13015-015-0062-4), 2015-12-23
Supplement: 13015_2015_62_MOESM2_ESM.pdf [file 13015_2015_62_MOESM2_ESM.pdf]

HIA: A genome mapper using Hybrid Index-based sequence Alignment  
 Jongpill Choi, Kiejung Park, Seong Beom Cho and Myungguen Chung

**1. Versions**

This lists the version numbers of each aligners used in the evaluation.

|   | Aligner | Version                        |
|---|---------|--------------------------------|
| 1 | HIA     | hia-1.0                        |
| 2 | BWA     | bwa-0.6.1, bwa-0.7.7           |
| 3 | Bowtie2 | bowtie2-2.1.0                  |
| 4 | Soap2   | soap2.21release                |
| 5 | SeqAlto | 0.5-r123_x86_64(seqalto_basic) |

**2. Summary of the parameters used in tests**

All aligners supply many parameters to tune the aligners in various situations. It is hard to test all possible parameter settings so that we select some parameter settings and test the aligners for the simulated datasets and the real datasets. We summarize the parameters used in the tests as follows:

| Aligner     | Options   | Description                                                          |
|-------------|-----------|----------------------------------------------------------------------|
| HIA         | -r FLOAT  | the error rate of reads; by default, 0.021                           |
|             | -x INT    | the max frequency of q-grams; by default, 100                        |
|             | -s INT    | the step size; by default, 4                                         |
| BWA [aln]   | -k INT    | maximum differences in the seed [2]                                  |
|             | -l INT    | seed length [32]                                                     |
|             | -o INT    | maximum number or fraction of gap opens [1]                          |
| BWA [bwasw] | -c FLOAT  | coefficient of length-threshold adjustment [5.5]                     |
|             | -z INT    | Z-best [1]                                                           |
|             | -s INT    | maximum seeding interval size [3]                                    |
| BWA [mem]   | -k INT    | minimum seed length [19]                                             |
|             | -r FLOAT  | look for internal seeds inside a seed longer than {-k} * FLOAT [1.5] |
| Bowtie2     | -D INT    | give up extending after <int> failed extends in a row (15)           |
|             | -R INT    | for reads w/ repetitive seeds, try <int> sets of seeds (2)           |
|             | -L INT    | length of seed substrings; must be >3, <32 (22)                      |
|             | -i <func> | interval between seed substrings w/r/t read len (S,1,1.25)           |
| SOAP2       | -l INT    | align the initial n bps as a seed [256] means whole length of read   |
|             | -v INT    | maximum number of mismatches allowed on a read. [5] bp               |
| SeqAlto     | -f        | Activates fast alignment mode, default off                           |
|             | -a        | Activates accurate alignment mode, default off                       |
|             | -u        | Disables gapped alignment, default off                               |

### 3. Simulated Reads

Six datasets were simulated from the GRCH37 build of the human genome using the Mason simulator (<http://www.segan.de/projects/mason.html>). The following are the command line parameters to simulate each dataset.

#### **Illumina-like 100 bp (unpaired) dataset**

Usage: mason illumina [Options] SEQUENCE

Options: -hn 2 -sq -n 100 -N 1000000 -rnp ill\_100 -o output-file

SEQUENCE: hg19.fa (including sex chromosomes and mitochondrial genome)

Description of given options

- hn: Number of haplotypes to simulate
- sq: Simulate qualities, generate FASTQ instead of FASTA
- n: The length of the reads to simulate (All resulting reads are the same length)
- N: Number of reads to simulate
- rnp: Read name prefix
- o: output file name to write results

#### **Illumina-like 150 bp (unpaired) dataset**

Usage: mason illumina [Options] SEQUENCE

Options: -hn 2 -sq -n 150 -N 1000000 -rnp ill\_150 -o output-file

SEQUENCE: hg19.fa (including sex chromosomes and mitochondrial genome)

Description of given options

- hn: Number of haplotypes to simulate
- sq: Simulate qualities, generate FASTQ instead of FASTA
- n: The length of the reads to simulate (All resulting reads are the same length)
- N: Number of reads to simulate
- rnp: Read name prefix
- o: output file name to write results

#### **Illumina-like 100 bp (paired-end) dataset**

Usage: mason illumina [Options] SEQUENCE

Options: -hn 2 -sq -rn 2 -mp -ll 375 -le 100 -n 100 -N 1000000 -rnp ill\_100\_pe -o output-file

SEQUENCE: hg19.fa (including sex chromosomes and mitochondrial genome)

Description of given options

- hn: Number of haplotypes to simulate
- sq: Simulate qualities, generate FASTQ instead of FASTA
- rn: Read name scheme in FASTQ files, 0-2
  - 2 = Add one-based slash-suffix, i.e. names will end on '/1' and '/2'
- mp: Enable mate pair simulation
- ll: Mate-pair mean library length
- le: Mate-pair library tolerance
- n: The length of the reads to simulate (All resulting reads are the same length)
- N: Number of reads to simulate
- rnp: Read name prefix
- o: output file name to write results

#### **Illumina-like 150 bp (paired-end) dataset**

Usage: mason illumina [Options] SEQUENCE

Options: -hn 2 -sq -rn 2 -mp -ll 375 -le 100 -n 150 -N 1000000 -rnp ill\_150\_pe -o output-file

SEQUENCE: hg19.fa (including sex chromosomes and mitochondrial genome)

Description of given options

- hn: Number of haplotypes to simulate
- sq: Simulate qualities, generate FASTQ instead of FASTA
- rn: Read name scheme in FASTQ files, 0-2
  - 2 = Add one-based slash-suffix, i.e. names will end on '/1' and '/2'
- mp: Enable mate pair simulation
- ll: Mate-pair mean library length
- le: Mate-pair library tolerance
- n: The length of the reads to simulate (All resulting reads are the same length)

-N: Number of reads to simulate  
-rnp: Read name prefix  
-o: output file name to write results

#### **454-like 250 bp (unpaired) dataset**

Usage: mason 454 [Options] SEQUENCE

Options: -hn 2 -sq -k 0.3 -bm 0.4 -bs 0.2 -nm 250 -N 1000000 -rnp 454\_250 -o output-file

SEQUENCE: hg19.fa (including sex chromosomes and mitochondrial genome)

Description of given options

-hn: Number of haplotypes to simulate  
-sq: Simulate qualities, generate FASTQ instead of FASTA  
-k: Proportionality factor for calculating standard deviation proportional to  $\sqrt{\text{homopolymer length}}$   
-bm: Background noise mean  
-bs: Background noise standard deviation  
-nm: The mean of the read lengths  
-N: Number of reads to simulate  
-rnp: Read name prefix  
-o: output file name to write results

#### **454-like 400 bp (unpaired) dataset**

Usage: mason 454 [Options] SEQUENCE

Options: -hn 2 -sq -k 0.3 -bm 0.4 -bs 0.2 -nm 250 -N 1000000 -rnp 454\_250 -o output-file

SEQUENCE: hg19.fa (including sex chromosomes and mitochondrial genome)

Description of given options

-hn: Number of haplotypes to simulate  
-sq: Simulate qualities, generate FASTQ instead of FASTA  
-k: Proportionality factor for calculating standard deviation proportional to  $\sqrt{\text{homopolymer length}}$   
-bm: Background noise mean  
-bs: Background noise standard deviation  
-nm: The mean of the read lengths  
-N: Number of reads to simulate  
-rnp: Read name prefix  
-o: output file name to write results

## **4. Real Reads**

The real Illumina datasets are based on the 101 bp×99 bp paired-end HiSeq (2000) reads from a human re-sequencing study [20]. It consists of 1,296,188,286 reads (101 bp×99 bp paired-end). The 454 dataset has NCBI Short Read Archive accession number SRR003161 and contains 1,375,489 reads with an average length of 355bp. For the performance tests, we prepared four datasets as follows:

#### **Whole of HiSeq 101bp×99 bp (paired-end) dataset**

NCBI Short Read Archive accession number SRR341919

It contains 1,296,188,286 (648094143×2) reads for the multi-thread test.

#### **HiSeq 101 bp (single-end) dataset**

It contains one million 101 bp reads of the HiSeq reads for single-end reads.

#### **HiSeq 101bp×99 bp (paired-end) dataset**

It contains one million 101 bp×99 bp paired-end reads of the HiSeq reads for paired-end reads.

#### **454-like 400 bp (single-end) dataset**

NCBI Short Read Archive accession number SRR003161

It contains 1,375,489 reads with an average length of 355bp.

## **5. Results for index generation**

The following is the command-line parameters and the results for indexing the GRCH37 build of the human genome. We download the GRCH37 build of the human genome (hg19) from UCSC Genome browser site. The reference genome used for our experiments consists of 25 chromosomes and its size is about 2.9 GB. The

indexing time of HIA is comparable to other aligners. Especially, HIA is able to reduce the time of index generation by using multiple threads.

| Aligner | Options           | Time (M) | Memory   | Size     | Generated files                                                                                              |
|---------|-------------------|----------|----------|----------|--------------------------------------------------------------------------------------------------------------|
| HIA     | -t 1 -q 14        | 165      | 20.32 GB | 12.63 GB | *.SA, *.idx, *.seq, and *.seqinfo                                                                            |
| HIA     | -t 12 -q 14       | 28       | 20.47 GB | 12.63 GB | *.SA, *.idx, *.seq, and *.seqinfo                                                                            |
| BWA     |                   | 69       | 4.53 GB  | 5.40GB   | *.amb, *.ann, *.bwt, *.pac, and *.sa                                                                         |
| bowtie2 |                   | 99       | 5.35 GB  | 4.10 GB  | *.1.bt2, *.2.bt2, *.3.bt2, *.4.bt2, *.rev.1.bt2, and *.rev.2.bt2                                             |
| soap2   |                   | 55       | 3.39 GB  | 5.90 GB  | *.amb, *.ann, *.bwt, *.fmv, *.hot, *.lkt, *.pac, *.rev.bwt, *.rev.fmv, *.rev.lkt, *.rev.pac, *.sa, and *.sai |
| seqAlto | -I 0 genome.fa 28 | 33       | 37.99 GB | 22.40 GB | *.midx                                                                                                       |
| seqAlto | -I 1 genome.fa 22 | 12       | 13.19 GB | 5.52 GB  | *.sidx                                                                                                       |

*Time measurement is elapsed time (minute). Memory is the peak memory for the index construction. Size is the sum of all generated files.*

In the perspective of SA construction, we performed several tests of index generation and compared the results to the result of divsufsort. Divsufsort algorithm is faster than HIA. However, HIA can reduce the generation time using multithreads and applying various q-gram sizes.

| Aligner    | Options     | Time (M) |
|------------|-------------|----------|
| HIA        | -t 1 -q 14  | 165      |
| HIA        | -t 12 -q 2  | 23       |
| HIA        | -t 12 -q 4  | 18       |
| HIA        | -t 12 -q 6  | 17       |
| HIA        | -t 12 -q 8  | 17       |
| HIA        | -t 12 -q 10 | 18       |
| HIA        | -t 12 -q 12 | 21       |
| HIA        | -t 12 -q 14 | 28       |
| divsufsort |             | 13       |

*Time measurement is elapsed time (minute).*

## 6. Performance of HT plus SA and the unmatched region alignment approach

We performed some tests using the simulated dataset (Illumina-like 100 bp [paired-end]) to observe the benefit of HT plus SA and the benefit of aligning the unmatched regions. The following result shows that the proposed approach can reduce overall alignment time.

|                         | Time (S) |
|-------------------------|----------|
| Proposed approach       | 497      |
| Aligning CAR by only NW | 907      |
| Finding CARs by only SA | 1060     |

*Time measurement is elapsed time (second).*

## 7. Memory consumption tests

We performed some tests using the simulated dataset (Illumina-like 100 bp [paired-end]) to observe the memory consumption of six aligners. We use the memusr shell script (<https://gist.github.com/netj/526585>) to measure the peak memory of each tool. HIA needs more memory than BWA, bowtie2, and soap2.

| Aligner | Options                          | Memory   |
|---------|----------------------------------|----------|
| HIA     | -s 4 -r 0.021 -x 200             | 18.73 GB |
| BWA     | -k 2 -l 32 -o 1                  | 3.28 GB  |
| BWA MEM | -k 19 -r 1.5                     | 5.40 GB  |
| bowtie2 | -D 15 -R 2 -N 0 -L 22 -i S,1,1.5 | 3.29 GB  |
| soap2   | -l 40 -v 3 -g 3 -m 250 -x 500    | 5.56 GB  |
| seqAlto | hg19.midx -a                     | 23.68 GB |

*Memory is the peak memory.*

## 8. Results of the multithreading tests

We ran six of the aligners with 6 threads and 12 threads modes for the whole of the paired-end HiSeq reads. HIA is faster than the other aligners for both 6 threads and 12 threads modes.

| Aligner | Options                          | Time (6 threads) | Time (12 threads) |
|---------|----------------------------------|------------------|-------------------|
| HIA     | -s 4 -r 0.021 -x 200             | 932              | 505               |
| BWA     | -k 2 -l 32 -o 1                  | 4006             | 2586              |
| BWA MEM | -k 19 -r 1.5                     | 1162             | 645               |
| bowtie2 | -D 15 -R 2 -N 0 -L 22 -i S,1,1.5 | 1180             | 789               |
| soap2   | -l 40 -v 3 -g 3 -m 250 -x 500    | 2217             | 1616              |
| seqAlto | hg19.midx -a                     | 3945             | 2077              |

*Time measurement is elapsed time (minute).*

## 9. Results for simulated datasets

The following are the results for simulated datasets. Time measure is elapsed time (second). Unique refers to  $\text{MAPQ} \geq 1$  if MAPQ is reported. Q10 refers to  $\text{MAPQ} \geq 10$ . %Err refers to the percentage aligned incorrectly among the reads in each criteria.

For both Illumina-like datasets and 454-like datasets, HIA is significantly faster than all of the other aligners except BWA MEM and SOAP2. SOAP2 is very fast, but not as sensitive as HIA. BWA is slightly more accurate, but not as sensitive as HIA for Illumina-like datasets. HIA is more sensitive and accurate than BWA for 454-like datasets. Bowtie2 is similar to HIA with regard to sensitivity, but not as accurate as HIA for both Illumina-like datasets and 454-like datasets. SeaAlto SeqAlto is slightly more accurate, but not as sensitive as HIA for Illumina-like datasets. BWA MEM is more accurate and more sensitive than HIA for Illumina-like datasets, but not as sensitive as HIA for 454-like datasets.

### Illumina-like 100 bp (single-end) dataset

|    | Aligner | Options              | Time | %Aligned | %Unique | [%Err]   | %Q10  | [%Err]   |
|----|---------|----------------------|------|----------|---------|----------|-------|----------|
| 1  | HIA     | -r 0.011 -x 50 -s 4  | 217  | 99.95    | 96.63   | [0.4079] | 94.74 | [0.1674] |
| 2  | HIA     | -r 0.011 -x 100 -s 4 | 221  | 99.97    | 96.62   | [0.3607] | 94.69 | [0.1450] |
| 3  | HIA     | -r 0.011 -x 200 -s 4 | 249  | 99.98    | 96.62   | [0.3164] | 94.66 | [0.1273] |
| 4  | HIA     | -r 0.011 -x 300 -s 4 | 264  | 99.98    | 96.62   | [0.2971] | 94.65 | [0.1181] |
| 5  | HIA     | -r 0.021 -x 50 -s 4  | 195  | 100.00   | 96.64   | [0.5340] | 95.36 | [0.2406] |
| 6  | HIA     | -r 0.021 -x 100 -s 4 | 237  | 100.00   | 96.63   | [0.4886] | 95.36 | [0.1952] |
| 7  | HIA     | -r 0.021 -x 200 -s 4 | 262  | 100.00   | 96.61   | [0.3654] | 95.35 | [0.1661] |
| 8  | HIA     | -r 0.021 -x 300 -s 4 | 307  | 100.00   | 96.60   | [0.3267] | 95.35 | [0.1510] |
| 9  | HIA     | -r 0.031 -x 50 -s 4  | 249  | 100.00   | 96.60   | [0.8353] | 95.42 | [0.3669] |
| 10 | HIA     | -r 0.031 -x 100 -s 4 | 312  | 100.00   | 96.58   | [0.6725] | 95.43 | [0.2884] |
| 11 | HIA     | -r 0.031 -x 200 -s 4 | 368  | 100.00   | 96.58   | [0.5300] | 95.45 | [0.2272] |
| 12 | HIA     | -r 0.031 -x 300 -s 4 | 399  | 100.00   | 96.57   | [0.4610] | 95.46 | [0.2026] |
| 13 | HIA     | -r 0.041 -x 50 -s 4  | 277  | 100.00   | 96.60   | [0.7832] | 95.74 | [0.3823] |
| 14 | HIA     | -r 0.041 -x 100 -s 4 | 328  | 100.00   | 96.58   | [0.6321] | 95.75 | [0.3018] |
| 15 | HIA     | -r 0.041 -x 200 -s 4 | 432  | 100.00   | 96.58   | [0.4983] | 95.78 | [0.2413] |
| 16 | HIA     | -r 0.041 -x 300 -s 4 | 464  | 100.00   | 96.57   | [0.4314] | 95.80 | [0.2151] |

|   | Aligner | Options         | Time | %Aligned | %Unique | [%Err]   | %Q10  | [%Err]   |
|---|---------|-----------------|------|----------|---------|----------|-------|----------|
| 1 | BWA     | -k 1 -l 32 -o 1 | 207  | 93.27    | 90.03   | [0.1812] | 89.91 | [0.1678] |
| 2 | BWA     | -k 1 -l 32 -o 2 | 236  | 94.70    | 91.43   | [0.1795] | 91.31 | [0.1660] |
| 3 | BWA     | -k 1 -l 28 -o 1 | 260  | 93.82    | 90.57   | [0.1834] | 90.44 | [0.1702] |

|    |     |                 |      |       |                |                |
|----|-----|-----------------|------|-------|----------------|----------------|
| 4  | BWA | -k 1 -l 32 -o 3 | 245  | 94.78 | 91.50 [0.1799] | 91.38 [0.1663] |
| 5  | BWA | -k 1 -l 28 -o 2 | 304  | 95.34 | 92.04 [0.1818] | 91.92 [0.1684] |
| 6  | BWA | -k 1 -l 24 -o 1 | 347  | 94.40 | 91.13 [0.1849] | 91.00 [0.1716] |
| 7  | BWA | -k 1 -l 28 -o 3 | 320  | 95.42 | 92.12 [0.1818] | 92.00 [0.1684] |
| 8  | BWA | -k 1 -l 24 -o 2 | 410  | 95.98 | 92.67 [0.1825] | 92.54 [0.1691] |
| 9  | BWA | -k 1 -l 24 -o 3 | 471  | 96.07 | 92.75 [0.1824] | 92.63 [0.1690] |
| 10 | BWA | -k 2 -l 32 -o 1 | 658  | 96.01 | 92.69 [0.1738] | 92.56 [0.1596] |
| 11 | BWA | -k 2 -l 28 -o 1 | 855  | 96.19 | 92.86 [0.1740] | 92.73 [0.1596] |
| 12 | BWA | -k 2 -l 32 -o 2 | 843  | 97.70 | 94.34 [0.1713] | 94.21 [0.1568] |
| 13 | BWA | -k 2 -l 32 -o 3 | 758  | 97.81 | 94.44 [0.1714] | 94.31 [0.1569] |
| 14 | BWA | -k 2 -l 28 -o 2 | 960  | 97.90 | 94.54 [0.1711] | 94.41 [0.1566] |
| 15 | BWA | -k 2 -l 24 -o 1 | 1111 | 96.37 | 93.04 [0.1742] | 92.91 [0.1595] |
| 16 | BWA | -k 2 -l 28 -o 3 | 980  | 98.02 | 94.64 [0.1713] | 94.51 [0.1566] |
| 17 | BWA | -k 2 -l 24 -o 2 | 1242 | 98.11 | 94.73 [0.1711] | 94.60 [0.1562] |
| 18 | BWA | -k 2 -l 24 -o 3 | 1266 | 98.21 | 94.83 [0.1711] | 94.70 [0.1563] |

|   | Aligner | Options      | Time | %Aligned | %Unique [%Err] | %Q10 [%Err]    |
|---|---------|--------------|------|----------|----------------|----------------|
| 1 | BWA MEM | -k 17 -r 1.3 | 265  | 100.00   | 96.30 [0.0497] | 95.27 [0.0153] |
| 2 | BWA MEM | -k 17 -r 1.5 | 265  | 100.00   | 96.30 [0.0490] | 95.27 [0.0155] |
| 3 | BWA MEM | -k 17 -r 1.7 | 255  | 100.00   | 96.30 [0.0494] | 95.27 [0.0155] |
| 4 | BWA MEM | -k 19 -r 1.3 | 240  | 100.00   | 96.30 [0.0502] | 95.27 [0.0158] |
| 5 | BWA MEM | -k 19 -r 1.5 | 244  | 100.00   | 96.30 [0.0504] | 95.27 [0.0157] |
| 6 | BWA MEM | -k 19 -r 1.7 | 234  | 100.00   | 96.30 [0.0514] | 95.27 [0.0158] |
| 7 | BWA MEM | -k 21 -r 1.3 | 241  | 100.00   | 96.30 [0.0515] | 95.27 [0.0162] |
| 8 | BWA MEM | -k 21 -r 1.5 | 232  | 100.00   | 96.30 [0.0523] | 95.27 [0.0163] |
| 9 | BWA MEM | -k 21 -r 1.7 | 234  | 100.00   | 96.30 [0.0534] | 95.27 [0.0172] |

|   | Aligner | Options                           | Time | %Aligned | %Unique [%Err] | %Q10 [%Err]    |
|---|---------|-----------------------------------|------|----------|----------------|----------------|
| 1 | Bowtie2 | -D 5 -R 1 -N 0 -L 22 -i S,0,2.50  | 220  | 98.97    | 98.42 [2.6245] | 93.25 [0.0646] |
| 2 | Bowtie2 | -D 10 -R 2 -N 0 -L 22 -i S,0,2.50 | 306  | 99.52    | 99.03 [2.6145] | 93.70 [0.0392] |
| 3 | Bowtie2 | -D 15 -R 2 -N 0 -L 22 -i S,1,2.50 | 346  | 99.63    | 99.17 [2.5870] | 93.81 [0.0336] |
| 4 | Bowtie2 | -D 15 -R 2 -N 0 -L 22 -i S,1,2.20 | 346  | 99.60    | 99.12 [2.5941] | 93.76 [0.0354] |

|    |         |                                   |      |       |                |                |
|----|---------|-----------------------------------|------|-------|----------------|----------------|
| 5  | Bowtie2 | -D 15 -R 2 -N 0 -L 22 -i S,1,1.65 | 386  | 99.70 | 99.28 [2.5423] | 93.92 [0.0328] |
| 6  | Bowtie2 | -D 15 -R 2 -N 0 -L 22 -i S,1,1.15 | 439  | 99.83 | 99.44 [2.5085] | 94.08 [0.0293] |
| 7  | Bowtie2 | -D 15 -R 2 -N 0 -L 21 -i S,1,1.00 | 497  | 99.84 | 99.44 [2.5273] | 94.06 [0.0298] |
| 8  | Bowtie2 | -D 15 -R 2 -N 0 -L 20 -i S,1,0.75 | 636  | 99.85 | 99.45 [2.5100] | 94.08 [0.0291] |
| 9  | Bowtie2 | -D 15 -R 2 -N 0 -L 20 -i S,1,0.50 | 727  | 99.85 | 99.46 [2.4978] | 94.09 [0.0291] |
| 10 | Bowtie2 | -D 20 -R 3 -N 0 -L 20 -i S,1,0.50 | 999  | 99.93 | 99.59 [2.4551] | 94.19 [0.0237] |
| 11 | Bowtie2 | -D 25 -R 4 -N 0 -L 20 -i S,1,0.50 | 1291 | 99.95 | 99.63 [2.4252] | 94.22 [0.0208] |

|   | Aligner | Options          | Time | %Aligned | %Unique [%Err] | %Q10 [%Err]    |
|---|---------|------------------|------|----------|----------------|----------------|
| 1 | SOAP2   | -l 256 -v 3 -g 0 | 149  | 76.19    | 73.56 [0.1055] | 73.56 [0.1055] |
| 2 | SOAP2   | -l 256 -v 5 -g 0 | 154  | 76.19    | 73.56 [0.1055] | 73.56 [0.1055] |
| 3 | SOAP2   | -l 256 -v 7 -g 0 | 145  | 76.19    | 73.56 [0.1055] | 73.56 [0.1055] |
| 4 | SOAP2   | -l 75 -v 5 -g 0  | 195  | 77.98    | 75.23 [0.2071] | 75.23 [0.2071] |
| 5 | SOAP2   | -l 75 -v 7 -g 0  | 194  | 78.61    | 75.83 [0.2117] | 75.83 [0.2117] |
| 6 | SOAP2   | -l 75 -v 3 -g 0  | 196  | 77.32    | 74.61 [0.1921] | 74.61 [0.1921] |
| 7 | SOAP2   | -l 40 -v 7 -g 0  | 264  | 79.37    | 76.27 [0.4679] | 76.27 [0.4679] |
| 8 | SOAP2   | -l 40 -v 5 -g 0  | 294  | 78.52    | 75.60 [0.3772] | 75.60 [0.3772] |
| 9 | SOAP2   | -l 40 -v 3 -g 0  | 319  | 77.65    | 74.89 [0.2572] | 74.89 [0.2572] |
| 7 | SOAP2   | -l 28 -v 7 -g 0  |      | 0.00     | [0.0000]       | [0.0000]       |
| 8 | SOAP2   | -l 28 -v 5 -g 0  |      | 0.00     | [0.0000]       | [0.0000]       |
| 9 | SOAP2   | -l 28 -v 3 -g 0  |      | 0.00     | [0.0000]       | [0.0000]       |

|   | Aligner | Options                               | Time | %Aligned | %Unique [%Err] | %Q10 [%Err]    |
|---|---------|---------------------------------------|------|----------|----------------|----------------|
| 1 | SeqAlto | -f [Index mode: 0, k-mer_size: 28]    | 688  | 99.38    | 96.38 [0.3795] | 96.11 [0.2934] |
| 2 | SeqAlto | -a [Index mode: 0, k-mer_size: 28]    | 1513 | 99.59    | 96.30 [0.2901] | 96.00 [0.2240] |
| 3 | SeqAlto | -f -u [Index mode: 0, k-mer_size: 28] | 396  | 80.22    | 77.73 [0.3831] | 77.53 [0.3016] |
| 4 | SeqAlto | -a -u [Index mode: 0, k-mer_size: 28] | 466  | 80.57    | 77.77 [0.3333] | 77.51 [0.2583] |
| 5 | SeqAlto | -f [Index mode: 1, k-mer_size: 22]    | 451  | 99.21    | 96.22 [0.4684] | 95.94 [0.3492] |
| 6 | SeqAlto | -a [Index mode: 1, k-mer_size: 22]    | 1459 | 99.69    | 96.33 [0.2861] | 96.04 [0.2156] |
| 7 | SeqAlto | -f -u [Index mode: 1, k-mer_size: 22] | 127  | 80.07    | 77.60 [0.4437] | 77.40 [0.3355] |
| 8 | SeqAlto | -a -u [Index mode: 1, k-mer_size: 22] | 217  | 80.64    | 77.78 [0.3314] | 77.53 [0.2541] |



### Illumina-like 150 bp (single-end) dataset

|    | Aligner | Options              | Time | %Aligned | %Unique | [%Err]   | %Q10  | [%Err]   |
|----|---------|----------------------|------|----------|---------|----------|-------|----------|
| 1  | HIA     | -r 0.011 -x 50 -s 4  | 221  | 99.98    | 97.72   | [0.2600] | 96.08 | [0.0861] |
| 2  | HIA     | -r 0.011 -x 100 -s 4 | 250  | 99.99    | 97.62   | [0.2381] | 96.06 | [0.0777] |
| 3  | HIA     | -r 0.011 -x 200 -s 4 | 274  | 99.99    | 97.61   | [0.2175] | 96.03 | [0.0691] |
| 4  | HIA     | -r 0.011 -x 300 -s 4 | 275  | 99.99    | 97.60   | [0.2025] | 96.01 | [0.0641] |
| 5  | HIA     | -r 0.021 -x 50 -s 4  | 255  | 100.00   | 97.59   | [0.2758] | 96.77 | [0.1515] |
| 6  | HIA     | -r 0.021 -x 100 -s 4 | 301  | 100.00   | 97.58   | [0.2310] | 96.73 | [0.1266] |
| 7  | HIA     | -r 0.021 -x 200 -s 4 | 350  | 100.00   | 97.57   | [0.1931] | 96.69 | [0.1069] |
| 8  | HIA     | -r 0.021 -x 300 -s 4 | 369  | 100.00   | 97.56   | [0.1781] | 96.67 | [0.0988] |
| 9  | HIA     | -r 0.031 -x 50 -s 4  | 301  | 100.00   | 97.58   | [0.3525] | 96.96 | [0.2183] |
| 10 | HIA     | -r 0.031 -x 100 -s 4 | 372  | 100.00   | 97.57   | [0.2854] | 96.91 | [0.1703] |
| 11 | HIA     | -r 0.031 -x 200 -s 4 | 420  | 100.00   | 97.57   | [0.2318] | 96.86 | [0.1380] |
| 12 | HIA     | -r 0.031 -x 300 -s 4 | 510  | 100.00   | 97.56   | [0.2024] | 96.83 | [0.1213] |
| 13 | HIA     | -r 0.041 -x 50 -s 4  | 363  | 100.00   | 97.58   | [0.4528] | 97.27 | [0.3092] |
| 14 | HIA     | -r 0.041 -x 100 -s 4 | 378  | 100.00   | 97.58   | [0.3793] | 97.26 | [0.2420] |
| 15 | HIA     | -r 0.041 -x 200 -s 4 | 494  | 100.00   | 97.57   | [0.3012] | 97.26 | [0.1936] |
| 16 | HIA     | -r 0.041 -x 300 -s 4 | 530  | 100.00   | 97.56   | [0.2552] | 97.26 | [0.1643] |

|    | Aligner | Options         | Time | %Aligned | %Unique | [%Err]   | %Q10  | [%Err]   |
|----|---------|-----------------|------|----------|---------|----------|-------|----------|
| 1  | BWA     | -k 1 -l 32 -o 1 | 417  | 90.17    | 87.89   | [0.1105] | 87.82 | [0.1034] |
| 2  | BWA     | -k 1 -l 32 -o 2 | 541  | 93.78    | 91.41   | [0.1047] | 91.34 | [0.0973] |
| 3  | BWA     | -k 1 -l 28 -o 1 | 541  | 90.84    | 88.54   | [0.1118] | 88.47 | [0.1044] |
| 4  | BWA     | -k 1 -l 32 -o 3 | 644  | 94.10    | 91.72   | [0.1038] | 91.65 | [0.0965] |
| 5  | BWA     | -k 1 -l 28 -o 2 | 698  | 94.54    | 92.16   | [0.1049] | 92.09 | [0.0973] |
| 6  | BWA     | -k 1 -l 24 -o 1 | 730  | 91.50    | 89.18   | [0.1102] | 89.12 | [0.1024] |
| 7  | BWA     | -k 1 -l 28 -o 3 | 760  | 94.87    | 92.39   | [0.1040] | 92.33 | [0.0964] |
| 8  | BWA     | -k 1 -l 24 -o 2 | 929  | 95.31    | 92.91   | [0.1035] | 92.84 | [0.0955] |
| 9  | BWA     | -k 1 -l 24 -o 3 | 1006 | 95.65    | 93.24   | [0.1024] | 93.18 | [0.0944] |
| 10 | BWA     | -k 2 -l 32 -o 1 | 1214 | 93.18    | 90.83   | [0.1094] | 90.76 | [0.0956] |
| 11 | BWA     | -k 2 -l 28 -o 1 | 1581 | 93.39    | 91.03   | [0.1045] | 90.96 | [0.0961] |

|    |     |                 |      |       |       |          |       |          |
|----|-----|-----------------|------|-------|-------|----------|-------|----------|
| 12 | BWA | -k 2 -l 32 -o 2 | 1449 | 97.17 | 94.73 | [0.0967] | 94.66 | [0.0881] |
| 13 | BWA | -k 2 -l 32 -o 3 | 1513 | 97.53 | 95.09 | [0.0956] | 95.02 | [0.0870] |
| 14 | BWA | -k 2 -l 28 -o 2 | 1879 | 97.40 | 94.96 | [0.0968] | 94.89 | [0.0881] |
| 15 | BWA | -k 2 -l 24 -o 1 | 2110 | 93.58 | 91.23 | [0.1048] | 91.16 | [0.0963] |
| 16 | BWA | -k 2 -l 28 -o 3 | 1945 | 97.78 | 95.33 | [0.0957] | 95.26 | [0.0870] |
| 17 | BWA | -k 2 -l 24 -o 2 | 2770 | 97.63 | 95.18 | [0.0964] | 95.02 | [0.0878] |
| 18 | BWA | -k 2 -l 24 -o 3 | 2464 | 98.00 | 95.55 | [0.0953] | 95.48 | [0.0866] |

|   | Aligner | Options      | Time | %Aligned | %Unique | [%Err]   | %Q10  | [%Err]   |
|---|---------|--------------|------|----------|---------|----------|-------|----------|
| 1 | BWA MEM | -k 17 -r 1.3 | 355  | 100.00   | 97.36   | [0.0210] | 96.41 | [0.0053] |
| 2 | BWA MEM | -k 17 -r 1.5 | 343  | 100.00   | 97.36   | [0.0213] | 96.41 | [0.0054] |
| 3 | BWA MEM | -k 17 -r 1.7 | 339  | 100.00   | 97.36   | [0.0217] | 96.41 | [0.0057] |
| 4 | BWA MEM | -k 19 -r 1.3 | 338  | 100.00   | 97.36   | [0.0214] | 96.41 | [0.0055] |
| 5 | BWA MEM | -k 19 -r 1.5 | 308  | 100.00   | 97.36   | [0.0216] | 96.41 | [0.0057] |
| 6 | BWA MEM | -k 19 -r 1.7 | 310  | 100.00   | 97.36   | [0.0219] | 96.41 | [0.0058] |
| 7 | BWA MEM | -k 21 -r 1.3 | 298  | 100.00   | 97.36   | [0.0215] | 96.41 | [0.0058] |
| 8 | BWA MEM | -k 21 -r 1.5 | 299  | 100.00   | 97.36   | [0.0219] | 96.41 | [0.0059] |
| 9 | BWA MEM | -k 21 -r 1.7 | 292  | 100.00   | 97.36   | [0.0223] | 96.41 | [0.0059] |

|    | Aligner | Options                           | Time | %Aligned | %Unique | [%Err]   | %Q10  | [%Err]   |
|----|---------|-----------------------------------|------|----------|---------|----------|-------|----------|
| 1  | Bowtie2 | -D 5 -R 1 -N 0 -L 22 -i S,0,2.50  | 307  | 98.89    | 98.53   | [1.9995] | 94.68 | [0.0653] |
| 2  | Bowtie2 | -D 10 -R 2 -N 0 -L 22 -i S,0,2.50 | 436  | 99.59    | 99.34   | [1.8955] | 95.42 | [0.0289] |
| 3  | Bowtie2 | -D 15 -R 2 -N 0 -L 22 -i S,1,2.50 | 528  | 99.69    | 99.47   | [1.8662] | 95.55 | [0.0222] |
| 4  | Bowtie2 | -D 15 -R 2 -N 0 -L 22 -i S,1,2.20 | 537  | 99.71    | 99.50   | [1.8489] | 95.58 | [0.0212] |
| 5  | Bowtie2 | -D 15 -R 2 -N 0 -L 22 -i S,1,1.65 | 580  | 99.84    | 99.66   | [1.7854] | 95.78 | [0.0194] |
| 6  | Bowtie2 | -D 15 -R 2 -N 0 -L 22 -i S,1,1.15 | 670  | 99.88    | 99.72   | [1.7621] | 95.84 | [0.0192] |
| 7  | Bowtie2 | -D 15 -R 2 -N 0 -L 21 -i S,1,1.00 | 750  | 99.86    | 99.68   | [1.7650] | 95.81 | [0.0207] |
| 8  | Bowtie2 | -D 15 -R 2 -N 0 -L 20 -i S,1,0.75 | 947  | 99.87    | 99.71   | [1.7596] | 95.85 | [0.0202] |
| 9  | Bowtie2 | -D 15 -R 2 -N 0 -L 20 -i S,1,0.50 | 1122 | 99.88    | 99.73   | [1.7493] | 95.86 | [0.0192] |
| 10 | Bowtie2 | -D 20 -R 3 -N 0 -L 20 -i S,1,0.50 | 1562 | 99.95    | 99.82   | [1.7017] | 95.95 | [0.0133] |
| 11 | Bowtie2 | -D 25 -R 4 -N 0 -L 20 -i S,1,0.50 | 2069 | 99.97    | 99.87   | [1.6663] | 95.99 | [0.0094] |

|    | Aligner | Options          | Time | %Aligned | %Unique | [%Err]   | %Q10  | [%Err]   |
|----|---------|------------------|------|----------|---------|----------|-------|----------|
| 1  | SOAP2   | -l 256 -v 3 -g 0 | 213  | 64.61    | 63.00   | [0.0560] | 63.00 | [0.0560] |
| 2  | SOAP2   | -l 256 -v 5 -g 0 | 213  | 64.61    | 63.00   | [0.0560] | 63.00 | [0.0560] |
| 3  | SOAP2   | -l 256 -v 7 -g 0 | 212  | 64.61    | 63.00   | [0.0560] | 63.00 | [0.0560] |
| 4  | SOAP2   | -l 75 -v 5 -g 0  | 301  | 67.63    | 65.86   | [0.1742] | 65.86 | [0.1742] |
| 5  | SOAP2   | -l 75 -v 7 -g 0  | 297  | 68.25    | 66.42   | [0.1999] | 66.42 | [0.1999] |
| 6  | SOAP2   | -l 75 -v 3 -g 0  | 306  | 66.95    | 65.24   | [0.1346] | 65.24 | [0.1346] |
| 7  | SOAP2   | -l 40 -v 7 -g 0  | 525  | 68.72    | 66.78   | [0.2806] | 66.78 | [0.2806] |
| 8  | SOAP2   | -l 40 -v 5 -g 0  | 549  | 68.01    | 66.19   | [0.2200] | 66.19 | [0.2200] |
| 9  | SOAP2   | -l 40 -v 3 -g 0  | 557  | 67.19    | 65.48   | [0.1378] | 65.48 | [0.1378] |
| 10 | SOAP2   | -l 28 -v 7 -g 0  |      | 0.00     |         | [0.0000] |       | [0.0000] |
| 11 | SOAP2   | -l 28 -v 5 -g 0  |      | 0.00     |         | [0.0000] |       | [0.0000] |
| 12 | SOAP2   | -l 28 -v 3 -g 0  |      | 0.00     |         | [0.0000] |       | [0.0000] |

|   | Aligner | Options                               | Time | %Aligned | %Unique | [%Err]   | %Q10  | [%Err]   |
|---|---------|---------------------------------------|------|----------|---------|----------|-------|----------|
| 1 | SeqAlto | -f [Index mode: 0, k-mer_size: 28]    | 1178 | 99.61    | 97.34   | [0.2554] | 97.20 | [0.2057] |
| 2 | SeqAlto | -a [Index mode: 0, k-mer_size: 28]    | 3586 | 99.65    | 97.26   | [0.2035] | 97.09 | [0.1563] |
| 3 | SeqAlto | -f -u [Index mode: 0, k-mer_size: 28] | 398  | 71.59    | 69.95   | [0.2984] | 69.84 | [0.2421] |
| 4 | SeqAlto | -a -u [Index mode: 0, k-mer_size: 28] | 491  | 71.81    | 70.00   | [0.2626] | 69.86 | [0.1977] |
| 5 | SeqAlto | -f [Index mode: 1, k-mer_size: 22]    | 976  | 99.54    | 97.27   | [0.2752] | 97.14 | [0.2199] |
| 6 | SeqAlto | -a [Index mode: 1, k-mer_size: 22]    | 3608 | 99.68    | 97.25   | [0.1947] | 97.10 | [0.1490] |
| 7 | SeqAlto | -f -u [Index mode: 1, k-mer_size: 22] | 142  | 71.56    | 69.91   | [0.3093] | 69.81 | [0.2490] |
| 8 | SeqAlto | -a -u [Index mode: 1, k-mer_size: 22] | 247  | 71.85    | 70.01   | [0.2470] | 69.88 | [0.1873] |

#### Illumina-like 100 bp (paired-end) dataset

|   | Aligner | Options              | Time | %Aligned | %Unique | [%Err]   | %Q10  | [%Err]   |
|---|---------|----------------------|------|----------|---------|----------|-------|----------|
| 1 | HIA     | -r 0.011 -x 50 -s 4  | 438  | 99.80    | 97.07   | [0.1459] | 96.27 | [0.0644] |
| 2 | HIA     | -r 0.011 -x 100 -s 4 | 456  | 99.83    | 97.03   | [0.1419] | 96.28 | [0.0635] |
| 3 | HIA     | -r 0.011 -x 200 -s 4 | 504  | 99.84    | 97.05   | [0.1375] | 96.28 | [0.0633] |
| 4 | HIA     | -r 0.011 -x 300 -s 4 | 551  | 99.85    | 97.03   | [0.1352] | 96.28 | [0.0628] |
| 5 | HIA     | -r 0.021 -x 50 -s 4  | 455  | 99.94    | 97.19   | [0.1060] | 96.54 | [0.0489] |

|    |     |                      |      |       |                |                |
|----|-----|----------------------|------|-------|----------------|----------------|
| 6  | HIA | -r 0.021 -x 100 -s 4 | 497  | 99.95 | 97.16 [0.0914] | 96.54 [0.0458] |
| 7  | HIA | -r 0.021 -x 200 -s 4 | 573  | 99.95 | 97.14 [0.0871] | 96.54 [0.0424] |
| 8  | HIA | -r 0.021 -x 300 -s 4 | 663  | 99.95 | 97.12 [0.0852] | 96.54 [0.0415] |
| 9  | HIA | -r 0.031 -x 50 -s 4  | 641  | 99.94 | 97.21 [0.1340] | 96.54 [0.0669] |
| 10 | HIA | -r 0.031 -x 100 -s 4 | 681  | 99.95 | 92.20 [0.1139] | 96.56 [0.0566] |
| 11 | HIA | -r 0.031 -x 200 -s 4 | 804  | 99.95 | 97.19 [0.0961] | 96.58 [0.0523] |
| 12 | HIA | -r 0.031 -x 300 -s 4 | 903  | 99.96 | 97.18 [0.0933] | 96.58 [0.0500] |
| 13 | HIA | -r 0.041 -x 50 -s 4  | 741  | 99.94 | 97.20 [0.1296] | 96.68 [0.0727] |
| 14 | HIA | -r 0.041 -x 100 -s 4 | 747  | 99.95 | 97.20 [0.1049] | 96.71 [0.0600] |
| 15 | HIA | -r 0.041 -x 200 -s 4 | 882  | 99.96 | 97.19 [0.0901] | 96.74 [0.0530] |
| 16 | HIA | -r 0.041 -x 300 -s 4 | 1009 | 99.96 | 97.17 [0.0859] | 96.75 [0.0510] |

|    | Aligner | Options         | Time | %Aligned | %Unique [%Err] | %Q10 [%Err]    |
|----|---------|-----------------|------|----------|----------------|----------------|
| 1  | BWA     | -k 1 -l 32 -o 1 | 482  | 99.07    | 97.17 [0.1020] | 96.98 [0.0767] |
| 2  | BWA     | -k 1 -l 32 -o 2 | 558  | 99.33    | 97.38 [0.1003] | 97.18 [0.0735] |
| 3  | BWA     | -k 1 -l 28 -o 1 | 598  | 99.18    | 97.26 [0.1028] | 97.06 [0.0770] |
| 4  | BWA     | -k 1 -l 32 -o 3 | 548  | 99.34    | 97.40 [0.0998] | 97.19 [0.0737] |
| 5  | BWA     | -k 1 -l 28 -o 2 | 660  | 99.43    | 97.46 [0.0997] | 97.26 [0.0732] |
| 6  | BWA     | -k 1 -l 24 -o 1 | 755  | 99.27    | 97.33 [0.1026] | 97.13 [0.0761] |
| 7  | BWA     | -k 1 -l 28 -o 3 | 708  | 99.44    | 97.46 [0.1001] | 97.27 [0.0731] |
| 8  | BWA     | -k 1 -l 24 -o 2 | 861  | 99.52    | 97.52 [0.0990] | 97.32 [0.0730] |
| 9  | BWA     | -k 1 -l 24 -o 3 | 894  | 99.53    | 97.53 [0.0995] | 97.33 [0.0724] |
| 10 | BWA     | -k 2 -l 32 -o 1 | 1367 | 99.52    | 97.51 [0.0969] | 97.31 [0.0719] |
| 11 | BWA     | -k 2 -l 28 -o 1 | 1761 | 99.54    | 97.53 [0.0969] | 97.33 [0.0722] |
| 12 | BWA     | -k 2 -l 32 -o 2 | 1517 | 99.73    | 97.67 [0.0945] | 97.46 [0.0694] |
| 13 | BWA     | -k 2 -l 32 -o 3 | 1549 | 99.74    | 97.67 [0.0947] | 97.48 [0.0695] |
| 14 | BWA     | -k 2 -l 28 -o 2 | 1592 | 99.76    | 97.69 [0.0948] | 97.48 [0.0698] |
| 15 | BWA     | -k 2 -l 24 -o 1 | 2280 | 99.57    | 97.55 [0.0976] | 97.38 [0.0723] |
| 16 | BWA     | -k 2 -l 28 -o 3 | 1994 | 99.77    | 97.69 [0.0946] | 97.48 [0.0692] |
| 17 | BWA     | -k 2 -l 24 -o 2 | 2518 | 99.78    | 97.70 [0.0951] | 97.49 [0.0699] |
| 18 | BWA     | -k 2 -l 24 -o 3 | 2554 | 99.79    | 97.70 [0.0954] | 97.49 [0.0692] |

|   | Aligner | Options      | Time | %Aligned | %Unique | [%Err]   | %Q10  | [%Err]   |
|---|---------|--------------|------|----------|---------|----------|-------|----------|
| 1 | BWA MEM | -k 17 -r 1.3 | 646  | 99.99    | 98.03   | [0.0282] | 97.95 | [0.0172] |
| 2 | BWA MEM | -k 17 -r 1.5 | 635  | 99.99    | 98.03   | [0.0283] | 97.95 | [0.0173] |
| 3 | BWA MEM | -k 17 -r 1.7 | 623  | 99.99    | 98.03   | [0.0284] | 97.95 | [0.0174] |
| 4 | BWA MEM | -k 19 -r 1.3 | 598  | 99.99    | 98.03   | [0.0288] | 97.95 | [0.0178] |
| 5 | BWA MEM | -k 19 -r 1.5 | 592  | 99.99    | 98.03   | [0.0287] | 97.95 | [0.0178] |
| 6 | BWA MEM | -k 19 -r 1.7 | 586  | 99.99    | 98.03   | [0.0289] | 97.95 | [0.0182] |
| 7 | BWA MEM | -k 21 -r 1.3 | 587  | 99.99    | 98.03   | [0.0290] | 97.95 | [0.0182] |
| 8 | BWA MEM | -k 21 -r 1.5 | 583  | 99.99    | 98.03   | [0.0290] | 97.95 | [0.0184] |
| 9 | BWA MEM | -k 21 -r 1.7 | 570  | 99.99    | 98.03   | [0.0289] | 97.95 | [0.0183] |

|    | Aligner | Options                           | Time | %Aligned | %Unique | [%Err]   | %Q10  | [%Err]   |
|----|---------|-----------------------------------|------|----------|---------|----------|-------|----------|
| 1  | Bowtie2 | -D 5 -R 1 -N 0 -L 22 -i S,0,2.50  | 554  | 96.91    | 96.85   | [1.3958] | 93.52 | [0.0211] |
| 2  | Bowtie2 | -D 10 -R 2 -N 0 -L 22 -i S,0,2.50 | 558  | 96.95    | 96.89   | [1.3640] | 93.54 | [0.0164] |
| 3  | Bowtie2 | -D 15 -R 2 -N 0 -L 22 -i S,1,2.50 | 631  | 96.97    | 96.91   | [1.3492] | 93.56 | [0.0143] |
| 4  | Bowtie2 | -D 15 -R 2 -N 0 -L 22 -i S,1,2.20 | 659  | 96.97    | 96.91   | [1.3427] | 93.56 | [0.0142] |
| 5  | Bowtie2 | -D 15 -R 2 -N 0 -L 22 -i S,1,1.65 | 703  | 97.06    | 97.01   | [1.3220] | 93.65 | [0.0147] |
| 6  | Bowtie2 | -D 15 -R 2 -N 0 -L 22 -i S,1,1.15 | 781  | 97.09    | 97.04   | [1.3094] | 93.69 | [0.0143] |
| 7  | Bowtie2 | -D 15 -R 2 -N 0 -L 21 -i S,1,1.00 | 854  | 97.10    | 97.06   | [1.3033] | 93.71 | [0.0144] |
| 8  | Bowtie2 | -D 15 -R 2 -N 0 -L 20 -i S,1,0.75 | 981  | 97.11    | 97.06   | [1.3047] | 93.71 | [0.0141] |
| 9  | Bowtie2 | -D 15 -R 2 -N 0 -L 20 -i S,1,0.50 | 1108 | 97.11    | 97.06   | [1.3077] | 93.72 | [0.0137] |
| 10 | Bowtie2 | -D 20 -R 3 -N 0 -L 20 -i S,1,0.50 | 1575 | 97.13    | 97.08   | [1.2807] | 93.73 | [0.0131] |
| 11 | Bowtie2 | -D 25 -R 4 -N 0 -L 20 -i S,1,0.50 | 1691 | 97.13    | 97.09   | [1.2711] | 93.73 | [0.0128] |

|   | Aligner | Options                        | Time | %Aligned | %Unique | [%Err]   | %Q10 | [%Err]   |
|---|---------|--------------------------------|------|----------|---------|----------|------|----------|
| 1 | SOAP2   | -l 256 -v 3 -g 0 -m 250 -x 500 | 322  | 54.61    | 53.39   | [0.0457] |      | [0.0000] |
| 2 | SOAP2   | -l 256 -v 5 -g 0 -m 250 -x 500 | 362  | 54.61    | 53.39   | [0.0457] |      | [0.0000] |
| 3 | SOAP2   | -l 256 -v 7 -g 0 -m 250 -x 500 | 318  | 54.61    | 53.39   | [0.0457] |      | [0.0000] |
| 4 | SOAP2   | -l 75 -v 7 -g 0 -m 250 -x 500  | 382  | 57.86    | 56.55   | [0.0697] |      | [0.0000] |
| 5 | SOAP2   | -l 75 -v 5 -g 0 -m 250 -x 500  | 382  | 56.97    | 55.68   | [0.0686] |      | [0.0000] |
| 6 | SOAP2   | -l 75 -v 3 -g 0 -m 250 -x 500  | 381  | 56.08    | 54.81   | [0.0648] |      | [0.0000] |
| 7 | SOAP2   | -l 75 -v 7 -g 3 -m 250 -x 500  | 586  | 84.54    | 82.75   | [0.3356] |      | [0.0000] |

|    |       |                                |     |       |       |          |          |
|----|-------|--------------------------------|-----|-------|-------|----------|----------|
| 8  | SOAP2 | -l 75 -v 5 -g 3 -m 250 -x 500  | 627 | 84.37 | 82.62 | [0.3257] | [0.0000] |
| 9  | SOAP2 | -l 256 -v 7 -g 3 -m 250 -x 500 | 561 | 84.27 | 82.49 | [0.3375] | [0.0000] |
| 10 | SOAP2 | -l 256 -v 5 -g 3 -m 250 -x 500 | 559 | 84.23 | 82.49 | [0.3259] | [0.0000] |
| 11 | SOAP2 | -l 75 -v 3 -g 3 -m 250 -x 500  | 597 | 83.44 | 81.77 | [0.3000] | [0.0000] |
| 12 | SOAP2 | -l 256 -v 3 -g 3 -m 250 -x 500 | 557 | 82.73 | 81.07 | [0.2962] | [0.0000] |
| 13 | SOAP2 | -l 40 -v 7 -g 0 -m 250 -x 500  | 663 | 58.34 | 56.98 | [0.1243] | [0.0000] |
| 14 | SOAP2 | -l 40 -v 5 -g 0 -m 250 -x 500  | 668 | 57.40 | 56.08 | [0.1116] | [0.0000] |
| 15 | SOAP2 | -l 40 -v 3 -g 0 -m 250 -x 500  | 687 | 56.42 | 55.15 | [0.0881] | [0.0000] |
| 16 | SOAP2 | -l 40 -v 7 -g 3 -m 250 -x 500  | 846 | 84.04 | 82.26 | [0.3843] | [0.0000] |
| 17 | SOAP2 | -l 40 -v 5 -g 3 -m 250 -x 500  | 866 | 84.07 | 82.34 | [0.3541] | [0.0000] |
| 18 | SOAP2 | -l 40 -v 3 -g 3 -m 250 -x 500  | 903 | 83.65 | 81.98 | [0.3119] | [0.0000] |
| 19 | SOAP2 | -l 28 -v 7 -g 0 -m 250 -x 500  |     | 0.00  |       | [0.0000] | [0.0000] |
| 20 | SOAP2 | -l 28 -v 5 -g 0 -m 250 -x 500  |     | 0.00  |       | [0.0000] | [0.0000] |
| 21 | SOAP2 | -l 28 -v 3 -g 0 -m 250 -x 500  |     | 0.00  |       | [0.0000] | [0.0000] |
| 22 | SOAP2 | -l 28 -v 7 -g 3 -m 250 -x 500  |     | 0.00  |       | [0.0000] | [0.0000] |
| 23 | SOAP2 | -l 28 -v 5 -g 3 -m 250 -x 500  |     | 0.00  |       | [0.0000] | [0.0000] |
| 24 | SOAP2 | -l 28 -v 3 -g 3 -m 250 -x 500  |     | 0.00  |       | [0.0000] | [0.0000] |

|   | Aligner | Options                               | Time | %Aligned | %Unique | [%Err]   | %Q10  | [%Err]   |
|---|---------|---------------------------------------|------|----------|---------|----------|-------|----------|
| 1 | SeqAlto | -f [Index mode: 0, k-mer_size: 28]    | 1159 | 99.59    | 97.04   | [0.0864] | 96.89 | [0.0719] |
| 2 | SeqAlto | -a [Index mode: 0, k-mer_size: 28]    | 2799 | 99.61    | 97.16   | [0.0865] | 97.02 | [0.0815] |
| 3 | SeqAlto | -f -u [Index mode: 0, k-mer_size: 28] | 823  | 95.73    | 93.21   | [0.1220] | 92.95 | [0.0890] |
| 4 | SeqAlto | -a -u [Index mode: 0, k-mer_size: 28] | 826  | 95.73    | 93.21   | [0.1220] | 92.95 | [0.0890] |
| 5 | SeqAlto | -f [Index mode: 1, k-mer_size: 22]    | 934  | 99.57    | 96.84   | [0.0992] | 96.69 | [0.0782] |
| 6 | SeqAlto | -a [Index mode: 1, k-mer_size: 22]    | 2945 | 99.61    | 97.15   | [0.0833] | 97.02 | [0.0788] |
| 7 | SeqAlto | -f -u [Index mode: 1, k-mer_size: 22] | 544  | 95.63    | 93.07   | [0.1387] | 92.81 | [0.0986] |
| 8 | SeqAlto | -a -u [Index mode: 1, k-mer_size: 22] | 872  | 95.86    | 93.26   | [0.1081] | 93.02 | [0.0920] |

**Illumina-like 150 bp (paired-end) dataset**

|   | Aligner | Options             | Time | %Aligned | %Unique | [%Err]   | %Q10  | [%Err]   |
|---|---------|---------------------|------|----------|---------|----------|-------|----------|
| 1 | HIA     | -r 0.011 -x 50 -s 4 | 443  | 99.92    | 98.09   | [0.1360] | 97.14 | [0.0508] |

|    |     |                      |      |       |                |                |
|----|-----|----------------------|------|-------|----------------|----------------|
| 2  | HIA | -r 0.011 -x 100 -s 4 | 482  | 99.93 | 98.08 [0.1325] | 97.14 [0.0503] |
| 3  | HIA | -r 0.011 -x 200 -s 4 | 482  | 99.93 | 98.06 [0.1288] | 97.14 [0.0499] |
| 4  | HIA | -r 0.011 -x 300 -s 4 | 545  | 99.93 | 98.05 [0.1245] | 97.12 [0.0492] |
| 5  | HIA | -r 0.021 -x 50 -s 4  | 521  | 99.99 | 98.12 [0.0923] | 97.62 [0.0489] |
| 6  | HIA | -r 0.021 -x 100 -s 4 | 566  | 99.99 | 98.10 [0.0825] | 97.62 [0.0460] |
| 7  | HIA | -r 0.021 -x 200 -s 4 | 701  | 99.99 | 98.09 [0.0793] | 97.61 [0.0458] |
| 8  | HIA | -r 0.021 -x 300 -s 4 | 722  | 99.99 | 98.08 [0.0766] | 97.61 [0.0453] |
| 9  | HIA | -r 0.031 -x 50 -s 4  | 668  | 99.99 | 98.11 [0.0957] | 97.77 [0.0554] |
| 10 | HIA | -r 0.031 -x 100 -s 4 | 696  | 99.99 | 98.11 [0.0812] | 97.78 [0.0494] |
| 11 | HIA | -r 0.031 -x 200 -s 4 | 856  | 99.99 | 98.09 [0.0729] | 97.80 [0.0455] |
| 12 | HIA | -r 0.031 -x 300 -s 4 | 1043 | 99.99 | 98.08 [0.0690] | 97.79 [0.0440] |
| 13 | HIA | -r 0.041 -x 50 -s 4  | 770  | 99.99 | 98.12 [0.1133] | 97.85 [0.0719] |
| 14 | HIA | -r 0.041 -x 100 -s 4 | 783  | 99.99 | 98.12 [0.0954] | 97.87 [0.0628] |
| 15 | HIA | -r 0.041 -x 200 -s 4 | 1014 | 99.99 | 98.11 [0.0836] | 97.88 [0.0568] |
| 16 | HIA | -r 0.041 -x 300 -s 4 | 1153 | 99.99 | 98.10 [0.0780] | 97.89 [0.0537] |

|    | Aligner | Options         | Time | %Aligned | %Unique [%Err] | %Q10 [%Err]    |
|----|---------|-----------------|------|----------|----------------|----------------|
| 1  | BWA     | -k 1 -l 32 -o 1 | 960  | 98.53    | 97.15 [0.3545] | 97.04 [0.3419] |
| 2  | BWA     | -k 1 -l 32 -o 2 | 1182 | 99.28    | 97.79 [0.2726] | 97.69 [0.2611] |
| 3  | BWA     | -k 1 -l 28 -o 1 | 1208 | 98.67    | 97.27 [0.3299] | 97.16 [0.3174] |
| 4  | BWA     | -k 1 -l 32 -o 3 | 1278 | 99.33    | 97.84 [0.2644] | 97.73 [0.2525] |
| 5  | BWA     | -k 1 -l 28 -o 2 | 1508 | 99.39    | 97.88 [0.2458] | 97.77 [0.2341] |
| 6  | BWA     | -k 1 -l 24 -o 1 | 1598 | 98.80    | 97.38 [0.3045] | 97.28 [0.2920] |
| 7  | BWA     | -k 1 -l 28 -o 3 | 1621 | 99.44    | 97.92 [0.2362] | 97.81 [0.2243] |
| 8  | BWA     | -k 1 -l 24 -o 2 | 1966 | 99.49    | 97.96 [0.2154] | 97.85 [0.2042] |
| 9  | BWA     | -k 1 -l 24 -o 3 | 2095 | 99.53    | 97.99 [0.2053] | 97.88 [0.1943] |
| 10 | BWA     | -k 2 -l 32 -o 1 | 2553 | 99.12    | 97.65 [0.2265] | 97.55 [0.2142] |
| 11 | BWA     | -k 2 -l 28 -o 1 | 3311 | 99.16    | 97.69 [0.2182] | 97.58 [0.2064] |
| 12 | BWA     | -k 2 -l 32 -o 2 | 2983 | 99.71    | 98.12 [0.1275] | 98.01 [0.1166] |
| 13 | BWA     | -k 2 -l 32 -o 3 | 3083 | 99.74    | 98.14 [0.1169] | 98.03 [0.1058] |
| 14 | BWA     | -k 2 -l 28 -o 2 | 3793 | 99.73    | 98.13 [0.1177] | 98.02 [0.1068] |
| 15 | BWA     | -k 2 -l 24 -o 1 | 4315 | 99.19    | 97.71 [0.2130] | 97.60 [0.2007] |

|    |     |                 |      |       |       |          |       |          |
|----|-----|-----------------|------|-------|-------|----------|-------|----------|
| 16 | BWA | -k 2 -l 28 -o 3 | 3900 | 99.76 | 98.16 | [0.1068] | 98.05 | [0.0960] |
| 17 | BWA | -k 2 -l 24 -o 2 | 4866 | 99.75 | 98.15 | [0.1092] | 98.04 | [0.0986] |
| 18 | BWA | -k 2 -l 24 -o 3 | 5380 | 99.78 | 98.17 | [0.0983] | 98.06 | [0.0876] |

|   | Aligner | Options      | Time | %Aligned | %Unique | [%Err]   | %Q10  | [%Err]   |
|---|---------|--------------|------|----------|---------|----------|-------|----------|
| 1 | BWA MEM | -k 17 -r 1.3 | 769  | 99.99    | 98.43   | [0.0140] | 98.39 | [0.0096] |
| 2 | BWA MEM | -k 17 -r 1.5 | 752  | 99.99    | 98.43   | [0.0140] | 98.38 | [0.0096] |
| 3 | BWA MEM | -k 17 -r 1.7 | 741  | 99.99    | 98.43   | [0.0140] | 98.39 | [0.0095] |
| 4 | BWA MEM | -k 19 -r 1.3 | 692  | 99.99    | 98.43   | [0.0138] | 98.39 | [0.0096] |
| 5 | BWA MEM | -k 19 -r 1.5 | 683  | 99.99    | 98.43   | [0.0139] | 98.39 | [0.0096] |
| 6 | BWA MEM | -k 19 -r 1.7 | 671  | 99.99    | 98.43   | [0.0139] | 98.39 | [0.0096] |
| 7 | BWA MEM | -k 21 -r 1.3 | 663  | 99.99    | 98.43   | [0.0139] | 98.39 | [0.0096] |
| 8 | BWA MEM | -k 21 -r 1.5 | 657  | 99.99    | 98.43   | [0.0139] | 98.39 | [0.0096] |
| 9 | BWA MEM | -k 21 -r 1.7 | 649  | 99.99    | 98.43   | [0.0137] | 98.39 | [0.0092] |

|    | Aligner | Options                           | Time | %Aligned | %Unique | [%Err]   | %Q10  | [%Err]   |
|----|---------|-----------------------------------|------|----------|---------|----------|-------|----------|
| 1  | Bowtie2 | -D 5 -R 1 -N 0 -L 22 -i S,0,2.50  | 757  | 96.96    | 96.90   | [1.1354] | 93.90 | [0.0195] |
| 2  | Bowtie2 | -D 10 -R 2 -N 0 -L 22 -i S,0,2.50 | 796  | 97.01    | 96.96   | [1.1187] | 93.95 | [0.0147] |
| 3  | Bowtie2 | -D 15 -R 2 -N 0 -L 22 -i S,1,2.50 | 901  | 97.03    | 97.00   | [1.1053] | 93.97 | [0.0119] |
| 4  | Bowtie2 | -D 15 -R 2 -N 0 -L 22 -i S,1,2.20 | 946  | 97.08    | 97.04   | [1.0819] | 94.03 | [0.0104] |
| 5  | Bowtie2 | -D 15 -R 2 -N 0 -L 22 -i S,1,1.65 | 990  | 97.10    | 97.07   | [1.0576] | 94.07 | [0.0117] |
| 6  | Bowtie2 | -D 15 -R 2 -N 0 -L 22 -i S,1,1.15 | 1042 | 97.11    | 97.08   | [1.0366] | 94.09 | [0.0122] |
| 7  | Bowtie2 | -D 15 -R 2 -N 0 -L 21 -i S,1,1.00 | 1120 | 97.11    | 97.09   | [1.0419] | 94.10 | [0.0070] |
| 8  | Bowtie2 | -D 15 -R 2 -N 0 -L 20 -i S,1,0.75 | 1305 | 97.11    | 97.09   | [1.0368] | 94.10 | [0.0104] |
| 9  | Bowtie2 | -D 15 -R 2 -N 0 -L 20 -i S,1,0.50 | 1538 | 97.11    | 97.09   | [1.0254] | 94.12 | [0.0112] |
| 10 | Bowtie2 | -D 20 -R 3 -N 0 -L 20 -i S,1,0.50 | 2174 | 97.13    | 97.11   | [1.0036] | 94.13 | [0.0087] |
| 11 | Bowtie2 | -D 25 -R 4 -N 0 -L 20 -i S,1,0.50 | 2348 | 97.13    | 97.12   | [0.9904] | 94.14 | [0.0083] |

|   | Aligner | Options                        | Time | %Aligned | %Unique | [%Err]   | %Q10 | [%Err]   |
|---|---------|--------------------------------|------|----------|---------|----------|------|----------|
| 1 | SOAP2   | -l 256 -v 3 -g 0 -m 250 -x 500 | 380  | 39.51    | 38.80   | [0.0157] |      | [0.0000] |
| 2 | SOAP2   | -l 256 -v 5 -g 0 -m 250 -x 500 | 379  | 39.51    | 38.80   | [0.0157] |      | [0.0000] |
| 3 | SOAP2   | -l 256 -v 7 -g 0 -m 250 -x 500 | 380  | 39.51    | 38.80   | [0.0157] |      | [0.0000] |



|    |       |                                |      |       |       |          |          |
|----|-------|--------------------------------|------|-------|-------|----------|----------|
| 4  | SOAP2 | -l 75 -v 7 -g 0 -m 250 -x 500  | 505  | 43.67 | 42.87 | [0.0490] | [0.0000] |
| 5  | SOAP2 | -l 75 -v 5 -g 0 -m 250 -x 500  | 506  | 42.99 | 42.21 | [0.0422] | [0.0000] |
| 6  | SOAP2 | -l 75 -v 3 -g 0 -m 250 -x 500  | 505  | 42.24 | 41.48 | [0.0318] | [0.0000] |
| 7  | SOAP2 | -l 75 -v 7 -g 3 -m 250 -x 500  | 856  | 75.25 | 74.04 | [0.3487] | [0.0000] |
| 8  | SOAP2 | -l 75 -v 5 -g 3 -m 250 -x 500  | 865  | 75.02 | 73.85 | [0.3358] | [0.0000] |
| 9  | SOAP2 | -l 256 -v 7 -g 3 -m 250 -x 500 | 771  | 74.44 | 73.28 | [0.3443] | [0.0000] |
| 10 | SOAP2 | -l 256 -v 5 -g 3 -m 250 -x 500 | 779  | 74.35 | 73.21 | [0.3344] | [0.0000] |
| 11 | SOAP2 | -l 75 -v 3 -g 3 -m 250 -x 500  | 876  | 73.18 | 72.08 | [0.3037] | [0.0000] |
| 12 | SOAP2 | -l 256 -v 3 -g 3 -m 250 -x 500 | 767  | 70.71 | 69.65 | [0.3041] | [0.0000] |
| 13 | SOAP2 | -l 40 -v 7 -g 0 -m 250 -x 500  | 1074 | 44.10 | 43.27 | [0.0654] | [0.0000] |
| 14 | SOAP2 | -l 40 -v 5 -g 0 -m 250 -x 500  | 1072 | 43.39 | 42.59 | [0.0505] | [0.0000] |
| 15 | SOAP2 | -l 40 -v 3 -g 0 -m 250 -x 500  | 1097 | 42.53 | 41.76 | [0.0342] | [0.0000] |
| 16 | SOAP2 | -l 40 -v 7 -g 3 -m 250 -x 500  | 1435 | 75.17 | 73.95 | [0.3612] | [0.0000] |
| 17 | SOAP2 | -l 40 -v 5 -g 3 -m 250 -x 500  | 1615 | 75.01 | 73.83 | [0.3406] | [0.0000] |
| 18 | SOAP2 | -l 40 -v 3 -g 3 -m 250 -x 500  | 1460 | 73.42 | 72.31 | [0.3044] | [0.0000] |
| 19 | SOAP2 | -l 28 -v 7 -g 0 -m 250 -x 500  |      | 0.00  |       | [0.0000] | [0.0000] |
| 20 | SOAP2 | -l 28 -v 5 -g 0 -m 250 -x 500  |      | 0.00  |       | [0.0000] | [0.0000] |
| 21 | SOAP2 | -l 28 -v 3 -g 0 -m 250 -x 500  |      | 0.00  |       | [0.0000] | [0.0000] |
| 22 | SOAP2 | -l 28 -v 7 -g 3 -m 250 -x 500  |      | 0.00  |       | [0.0000] | [0.0000] |
| 23 | SOAP2 | -l 28 -v 5 -g 3 -m 250 -x 500  |      | 0.00  |       | [0.0000] | [0.0000] |
| 24 | SOAP2 | -l 28 -v 3 -g 3 -m 250 -x 500  |      | 0.00  |       | [0.0000] | [0.0000] |

|   | Aligner | Options                               | Time | %Aligned | %Unique | [%Err]   | %Q10  | [%Err]   |
|---|---------|---------------------------------------|------|----------|---------|----------|-------|----------|
| 1 | SeqAlto | -f [Index mode: 0, k-mer_size: 28]    | 2053 | 99.58    | 97.73   | [0.0733] | 97.69 | [0.0684] |
| 2 | SeqAlto | -a [Index mode: 0, k-mer_size: 28]    | 6877 | 99.58    | 97.80   | [0.0764] | 97.74 | [0.0740] |
| 3 | SeqAlto | -f -u [Index mode: 0, k-mer_size: 28] | 1007 | 91.53    | 89.68   | [0.1198] | 89.54 | [0.0957] |
| 4 | SeqAlto | -a -u [Index mode: 0, k-mer_size: 28] | 1026 | 91.53    | 89.68   | [0.1198] | 89.54 | [0.0957] |
| 5 | SeqAlto | -f [Index mode: 1, k-mer_size: 22]    | 1939 | 99.58    | 97.65   | [0.0783] | 97.61 | [0.0703] |
| 6 | SeqAlto | -a [Index mode: 1, k-mer_size: 22]    | 7191 | 99.58    | 97.80   | [0.0723] | 97.74 | [0.0698] |
| 7 | SeqAlto | -f -u [Index mode: 1, k-mer_size: 22] | 746  | 91.49    | 89.63   | [0.1267] | 89.50 | [0.0968] |
| 8 | SeqAlto | -a -u [Index mode: 1, k-mer_size: 22] | 992  | 91.64    | 89.73   | [0.0923] | 89.60 | [0.0788] |

454-like 250 bp (single-end) dataset

|    | Aligner | Options              | Time | %Aligned | %Unique | [%Err]   | %Q10  | [%Err]   |
|----|---------|----------------------|------|----------|---------|----------|-------|----------|
| 1  | HIA     | -r 0.011 -x 50 -s 4  | 771  | 96.49    | 95.02   | [0.4536] | 91.96 | [0.1187] |
| 2  | HIA     | -r 0.011 -x 100 -s 4 | 1009 | 97.70    | 96.20   | [0.4338] | 93.00 | [0.1190] |
| 3  | HIA     | -r 0.011 -x 200 -s 4 | 1175 | 98.47    | 96.95   | [0.4349] | 93.62 | [0.1259] |
| 4  | HIA     | -r 0.011 -x 300 -s 4 | 1317 | 98.81    | 97.28   | [0.4380] | 93.87 | [0.1288] |
| 5  | HIA     | -r 0.021 -x 50 -s 4  | 805  | 99.81    | 98.24   | [0.5380] | 93.84 | [0.1419] |
| 6  | HIA     | -r 0.021 -x 100 -s 4 | 848  | 99.89    | 98.32   | [0.5325] | 93.81 | [0.1467] |
| 7  | HIA     | -r 0.021 -x 200 -s 4 | 981  | 99.92    | 98.35   | [0.5462] | 93.72 | [0.1547] |
| 8  | HIA     | -r 0.021 -x 300 -s 4 | 1087 | 99.93    | 98.36   | [0.5475] | 93.65 | [0.1494] |
| 9  | HIA     | -r 0.031 -x 50 -s 4  | 692  | 99.95    | 98.29   | [0.4544] | 93.40 | [0.1373] |
| 10 | HIA     | -r 0.031 -x 100 -s 4 | 818  | 99.96    | 98.30   | [0.4507] | 93.29 | [0.1446] |
| 11 | HIA     | -r 0.031 -x 200 -s 4 | 800  | 99.96    | 98.31   | [0.4559] | 92.94 | [0.1475] |
| 12 | HIA     | -r 0.031 -x 300 -s 4 | 917  | 99.96    | 98.31   | [0.4571] | 92.91 | [0.1419] |
| 13 | HIA     | -r 0.041 -x 50 -s 4  | 833  | 99.95    | 98.26   | [0.4149] | 94.62 | [0.1718] |
| 14 | HIA     | -r 0.041 -x 100 -s 4 | 856  | 99.96    | 98.28   | [0.4133] | 94.61 | [0.1779] |
| 15 | HIA     | -r 0.041 -x 200 -s 4 | 955  | 99.96    | 98.28   | [0.4182] | 94.49 | [0.1784] |
| 16 | HIA     | -r 0.041 -x 300 -s 4 | 1009 | 99.96    | 98.28   | [0.4189] | 94.38 | [0.1772] |

|   | Aligner | Options          | Time | %Aligned | %Unique | [%Err]   | %Q10  | [%Err]   |
|---|---------|------------------|------|----------|---------|----------|-------|----------|
| 1 | BWA-SW  | -c 5.5 -z 1 -s 1 | 1589 | 96.85    | 93.87   | [1.7514] | 90.46 | [0.1199] |
| 2 | BWA-SW  | -c 5.5 -z 1 -s 2 | 1727 | 96.85    | 94.24   | [1.4921] | 90.98 | [0.0857] |
| 3 | BWA-SW  | -c 5.5 -z 2 -s 1 | 2249 | 99.83    | 97.46   | [0.8630] | 94.24 | [0.0359] |
| 4 | BWA-SW  | -c 5.5 -z 1 -s 3 | 1852 | 96.85    | 94.32   | [1.3510] | 91.18 | [0.0780] |
| 5 | BWA-SW  | -c 5.5 -z 3 -s 1 | 2629 | 99.86    | 97.51   | [0.8282] | 93.81 | [0.0329] |
| 6 | BWA-SW  | -c 5.5 -z 2 -s 2 | 2462 | 99.83    | 97.52   | [0.7380] | 94.66 | [0.0357] |
| 7 | BWA-SW  | -c 5.5 -z 2 -s 3 | 2654 | 99.83    | 97.53   | [0.6827] | 94.79 | [0.0363] |
| 8 | BWA-SW  | -c 5.5 -z 3 -s 2 | 2908 | 99.86    | 97.59   | [0.7327] | 94.23 | [0.0351] |
| 9 | BWA-SW  | -c 5.5 -z 3 -s 3 | 3157 | 99.86    | 97.61   | [0.6735] | 94.38 | [0.0357] |

|  | Aligner | Options | Time | %Aligned | %Unique | [%Err] | %Q10 | [%Err] |
|--|---------|---------|------|----------|---------|--------|------|--------|
|--|---------|---------|------|----------|---------|--------|------|--------|

|   |         |              |      |        |       |          |       |          |
|---|---------|--------------|------|--------|-------|----------|-------|----------|
| 1 | BWA MEM | -k 17 -r 1.3 | 1497 | 100.00 | 97.92 | [0.0767] | 97.26 | [0.0346] |
| 2 | BWA MEM | -k 17 -r 1.5 | 1425 | 100.00 | 97.92 | [0.0796] | 97.26 | [0.0362] |
| 3 | BWA MEM | -k 17 -r 1.7 | 1353 | 100.00 | 97.92 | [0.0838] | 97.25 | [0.0381] |
| 4 | BWA MEM | -k 19 -r 1.3 | 1176 | 100.00 | 97.92 | [0.0801] | 97.25 | [0.0372] |
| 5 | BWA MEM | -k 19 -r 1.5 | 1133 | 100.00 | 97.91 | [0.0846] | 97.25 | [0.0385] |
| 6 | BWA MEM | -k 19 -r 1.7 | 1095 | 100.00 | 97.91 | [0.0897] | 97.24 | [0.0395] |
| 7 | BWA MEM | -k 21 -r 1.3 | 1096 | 100.00 | 97.91 | [0.0856] | 97.24 | [0.0383] |
| 8 | BWA MEM | -k 21 -r 1.5 | 1045 | 100.00 | 97.90 | [0.0921] | 97.23 | [0.0412] |
| 9 | BWA MEM | -k 21 -r 1.7 | 990  | 100.00 | 97.89 | [0.1039] | 97.22 | [0.0460] |

|    | Aligner | Options                           | Time | %Aligned | %Unique | [%Err]   | %Q10  | [%Err]   |
|----|---------|-----------------------------------|------|----------|---------|----------|-------|----------|
| 1  | Bowtie2 | -D 5 -R 1 -N 0 -L 25 -i S,1,2.0   | 413  | 90.32    | 78.23   | [1.5838] | 35.87 | [0.0084] |
| 2  | Bowtie2 | -D 5 -R 1 -N 0 -L 22 -i S,1,2.50  | 418  | 88.72    | 76.58   | [1.7353] | 35.19 | [0.0136] |
| 3  | Bowtie2 | -D 10 -R 2 -N 0 -L 22 -i S,1,2.50 | 608  | 91.24    | 78.62   | [1.4714] | 35.90 | [0.0061] |
| 4  | Bowtie2 | -D 10 -R 2 -N 0 -L 22 -i S,1,1.75 | 706  | 95.88    | 81.67   | [1.2559] | 36.39 | [0.0066] |
| 5  | Bowtie2 | -D 15 -R 2 -N 0 -L 22 -i S,1,2.50 | 728  | 91.65    | 78.90   | [1.3712] | 35.97 | [0.0050] |
| 6  | Bowtie2 | -D 15 -R 2 -N 0 -L 22 -i S,1,2.20 | 772  | 93.65    | 80.28   | [1.2681] | 36.21 | [0.0039] |
| 7  | Bowtie2 | -D 15 -R 2 -N 0 -L 22 -i S,1,1.65 | 867  | 96.72    | 82.15   | [1.1105] | 36.44 | [0.0022] |
| 8  | Bowtie2 | -D 15 -R 2 -N 0 -L 22 -i S,1,1.15 | 989  | 98.40    | 82.93   | [0.9650] | 36.49 | [0.0025] |
| 9  | Bowtie2 | -D 15 -R 2 -N 0 -L 21 -i S,1,1.00 | 1109 | 98.76    | 83.05   | [0.9504] | 36.49 | [0.0016] |
| 10 | Bowtie2 | -D 15 -R 2 -N 0 -L 20 -i S,1,0.75 | 1359 | 99.06    | 83.13   | [0.9106] | 36.47 | [0.0016] |
| 11 | Bowtie2 | -D 15 -R 2 -N 0 -L 20 -i S,1,0.50 | 1591 | 99.24    | 83.23   | [0.8648] | 36.49 | [0.0014] |
| 12 | Bowtie2 | -D 20 -R 3 -N 0 -L 20 -i S,1,0.50 | 2224 | 99.47    | 83.35   | [0.7182] | 36.47 | [0.0011] |
| 13 | Bowtie2 | -D 25 -R 4 -N 0 -L 20 -i S,1,0.50 | 2947 | 99.59    | 83.40   | [0.5980] | 36.44 | [0.0011] |

#### 454-like 400 bp (single-end) dataset

|   | Aligner | Options              | Time | %Aligned | %Unique | [%Err]   | %Q10  | [%Err]   |
|---|---------|----------------------|------|----------|---------|----------|-------|----------|
| 1 | HIA     | -r 0.011 -x 50 -s 4  | 1499 | 97.75    | 96.60   | [0.2642] | 93.94 | [0.0379] |
| 2 | HIA     | -r 0.011 -x 100 -s 4 | 1856 | 98.63    | 97.45   | [0.2475] | 94.71 | [0.0348] |
| 3 | HIA     | -r 0.011 -x 200 -s 4 | 2518 | 99.09    | 97.91   | [0.2428] | 95.11 | [0.0367] |
| 4 | HIA     | -r 0.011 -x 300 -s 4 | 2582 | 99.26    | 98.08   | [0.2439] | 95.26 | [0.0393] |

|    |     |                      |      |       |                |                |
|----|-----|----------------------|------|-------|----------------|----------------|
| 5  | HIA | -r 0.021 -x 50 -s 4  | 1139 | 99.74 | 98.57 [0.2681] | 95.50 [0.0269] |
| 6  | HIA | -r 0.021 -x 100 -s 4 | 1256 | 99.75 | 98.58 [0.2646] | 95.51 [0.0284] |
| 7  | HIA | -r 0.021 -x 200 -s 4 | 1377 | 99.76 | 98.59 [0.2654] | 95.49 [0.0302] |
| 8  | HIA | -r 0.021 -x 300 -s 4 | 1495 | 99.76 | 98.59 [0.2686] | 95.48 [0.0333] |
| 9  | HIA | -r 0.031 -x 50 -s 4  | 958  | 99.75 | 98.51 [0.1938] | 95.34 [0.0228] |
| 10 | HIA | -r 0.031 -x 100 -s 4 | 1021 | 99.76 | 98.52 [0.1865] | 95.36 [0.0220] |
| 11 | HIA | -r 0.031 -x 200 -s 4 | 1016 | 99.76 | 98.52 [0.1869] | 95.37 [0.0233] |
| 12 | HIA | -r 0.031 -x 300 -s 4 | 1135 | 99.76 | 98.52 [0.1861] | 95.36 [0.0251] |
| 13 | HIA | -r 0.041 -x 50 -s 4  | 1076 | 99.75 | 98.47 [0.1678] | 96.09 [0.0398] |
| 14 | HIA | -r 0.041 -x 100 -s 4 | 1199 | 99.76 | 98.48 [0.1574] | 96.13 [0.0376] |
| 15 | HIA | -r 0.041 -x 200 -s 4 | 1319 | 99.76 | 98.48 [0.1539] | 96.16 [0.0382] |
| 16 | HIA | -r 0.041 -x 300 -s 4 | 1378 | 99.76 | 98.48 [0.1557] | 96.17 [0.0397] |

|   | Aligner | Options          | Time | %Aligned | %Unique [%Err] | %Q10 [%Err]    |
|---|---------|------------------|------|----------|----------------|----------------|
| 1 | BWA-SW  | -c 5.5 -z 1 -s 1 | 2767 | 99.25    | 92.51 [0.9058] | 90.29 [0.0807] |
| 2 | BWA-SW  | -c 5.5 -z 1 -s 2 | 3009 | 99.25    | 92.82 [0.6624] | 90.72 [0.0572] |
| 3 | BWA-SW  | -c 5.5 -z 2 -s 1 | 3327 | 99.99    | 94.74 [0.2990] | 92.81 [0.0288] |
| 4 | BWA-SW  | -c 5.5 -z 1 -s 3 | 3191 | 99.25    | 92.90 [0.5512] | 90.87 [0.0489] |
| 5 | BWA-SW  | -c 5.5 -z 3 -s 1 | 4142 | 100.00   | 95.76 [0.2871] | 93.66 [0.0279] |
| 6 | BWA-SW  | -c 5.5 -z 2 -s 2 | 3721 | 99.99    | 94.85 [0.2349] | 93.06 [0.0279] |
| 7 | BWA-SW  | -c 5.5 -z 2 -s 3 | 4070 | 99.99    | 94.89 [0.2132] | 93.15 [0.0293] |
| 8 | BWA-SW  | -c 5.5 -z 3 -s 2 | 4666 | 100.00   | 95.86 [0.2273] | 93.91 [0.0279] |
| 9 | BWA-SW  | -c 5.5 -z 3 -s 3 | 5144 | 100.00   | 95.89 [0.2084] | 94.00 [0.0284] |

|   | Aligner | Options      | Time | %Aligned | %Unique [%Err] | %Q10 [%Err]    |
|---|---------|--------------|------|----------|----------------|----------------|
| 1 | BWA MEM | -k 17 -r 1.3 | 2426 | 99.99    | 98.46 [0.0471] | 97.98 [0.0238] |
| 2 | BWA MEM | -k 17 -r 1.5 | 2302 | 100.00   | 98.47 [0.0492] | 97.99 [0.0250] |
| 3 | BWA MEM | -k 17 -r 1.7 | 2199 | 100.00   | 98.46 [0.0505] | 97.98 [0.0252] |
| 4 | BWA MEM | -k 19 -r 1.3 | 1906 | 100.00   | 98.47 [0.0485] | 97.99 [0.0246] |
| 5 | BWA MEM | -k 19 -r 1.5 | 1851 | 100.00   | 98.47 [0.0496] | 97.99 [0.0248] |
| 6 | BWA MEM | -k 19 -r 1.7 | 1780 | 100.00   | 98.47 [0.0518] | 97.98 [0.0256] |
| 7 | BWA MEM | -k 21 -r 1.3 | 1771 | 100.00   | 98.47 [0.0489] | 97.98 [0.0248] |

|   |         |              |      |        |       |          |       |          |
|---|---------|--------------|------|--------|-------|----------|-------|----------|
| 8 | BWA MEM | -k 21 -r 1.5 | 1714 | 100.00 | 98.46 | [0.0505] | 97.98 | [0.0249] |
| 9 | BWA MEM | -k 21 -r 1.7 | 1643 | 100.00 | 98.46 | [0.0530] | 97.98 | [0.0255] |

|    | Aligner | Options                           | Time | %Aligned | %Unique | [%Err]   | %Q10  | [%Err]   |
|----|---------|-----------------------------------|------|----------|---------|----------|-------|----------|
| 1  | Bowtie2 | -D 5 -R 1 -N 0 -L 25 -i S,1,2.0   | 843  | 94.89    | 85.27   | [1.1837] | 32.70 | [0.0040] |
| 2  | Bowtie2 | -D 5 -R 1 -N 0 -L 22 -i S,1,2.50  | 900  | 93.57    | 84.05   | [1.3152] | 32.33 | [0.0056] |
| 3  | Bowtie2 | -D 10 -R 2 -N 0 -L 22 -i S,1,2.50 | 1380 | 95.77    | 85.80   | [1.0281] | 32.77 | [0.0018] |
| 4  | Bowtie2 | -D 10 -R 2 -N 0 -L 22 -i S,1,1.75 | 1615 | 98.49    | 87.69   | [0.8286] | 32.98 | [0.0006] |
| 5  | Bowtie2 | -D 15 -R 2 -N 0 -L 22 -i S,1,2.50 | 1736 | 96.03    | 85.96   | [0.9282] | 32.79 | [0.0037] |
| 6  | Bowtie2 | -D 15 -R 2 -N 0 -L 22 -i S,1,2.20 | 1799 | 97.26    | 86.84   | [0.8402] | 32.91 | [0.0018] |
| 7  | Bowtie2 | -D 15 -R 2 -N 0 -L 22 -i S,1,1.65 | 1980 | 98.90    | 87.89   | [0.7075] | 32.98 | [0.0009] |
| 8  | Bowtie2 | -D 15 -R 2 -N 0 -L 22 -i S,1,1.15 | 2217 | 99.64    | 88.28   | [0.5852] | 32.99 | [0.0003] |
| 9  | Bowtie2 | -D 15 -R 2 -N 0 -L 21 -i S,1,1.00 | 2463 | 99.76    | 88.34   | [0.5595] | 32.98 | [0.0006] |
| 10 | Bowtie2 | -D 15 -R 2 -N 0 -L 20 -i S,1,0.75 | 2941 | 99.83    | 88.37   | [0.5474] | 32.97 | [0.0000] |
| 11 | Bowtie2 | -D 15 -R 2 -N 0 -L 20 -i S,1,0.50 | 3363 | 99.88    | 88.38   | [0.5061] | 32.97 | [0.0003] |
| 12 | Bowtie2 | -D 20 -R 3 -N 0 -L 20 -i S,1,0.50 | 4860 | 99.93    | 88.36   | [0.3818] | 32.95 | [0.0000] |
| 13 | Bowtie2 | -D 25 -R 4 -N 0 -L 20 -i S,1,0.50 | 6597 | 99.96    | 88.35   | [0.3048] | 32.93 | [0.0000] |

## 10. Results for real datasets

The following are the results for real datasets. Time measure is elapsed time (second). Unique refers to MAPQ  $\geq 1$  if MAPQ is reported. Q10 refers to MAPQ  $\geq 10$ .

For HiSeq 101 bp (single-end) dataset and 454-like 400 bp (single-end), HIA and BWA MEM are higher ranks than the other aligners in terms of the speed and the total number of reads aligned. For the paired-end reads, the aligned percentage of Bowtie2 is higher than the other aligners, but HIA is faster than all of the other aligners except SOAP2.

### HiSeq 101 bp (single-end) dataset

|   | Aligner | Options              | Time | %Aligned | %Unique | %Q10  |
|---|---------|----------------------|------|----------|---------|-------|
| 1 | HIA     | -r 0.011 -x 50 -s 4  | 252  | 90.37    | 86.08   | 82.94 |
| 2 | HIA     | -r 0.011 -x 100 -s 4 | 288  | 90.55    | 86.19   | 82.93 |
| 3 | HIA     | -r 0.011 -x 200 -s 4 | 328  | 90.73    | 86.30   | 82.95 |
| 4 | HIA     | -r 0.011 -x 300 -s 4 | 359  | 90.84    | 86.38   | 82.96 |

|    |     |                      |     |       |       |       |
|----|-----|----------------------|-----|-------|-------|-------|
| 5  | HIA | -r 0.021 -x 50 -s 4  | 262 | 94.30 | 89.34 | 85.28 |
| 6  | HIA | -r 0.021 -x 100 -s 4 | 301 | 94.46 | 89.42 | 85.21 |
| 7  | HIA | -r 0.021 -x 200 -s 4 | 356 | 94.57 | 89.46 | 85.12 |
| 8  | HIA | -r 0.021 -x 300 -s 4 | 368 | 94.61 | 89.48 | 85.08 |
| 9  | HIA | -r 0.031 -x 50 -s 4  | 314 | 96.30 | 90.99 | 86.29 |
| 10 | HIA | -r 0.031 -x 100 -s 4 | 381 | 96.32 | 90.90 | 86.08 |
| 11 | HIA | -r 0.031 -x 200 -s 4 | 439 | 96.33 | 90.82 | 85.87 |
| 12 | HIA | -r 0.031 -x 300 -s 4 | 458 | 96.34 | 90.78 | 85.73 |
| 13 | HIA | -r 0.041 -x 50 -s 4  | 345 | 96.69 | 91.32 | 86.65 |
| 14 | HIA | -r 0.041 -x 100 -s 4 | 369 | 97.71 | 91.23 | 86.41 |
| 15 | HIA | -r 0.041 -x 200 -s 4 | 433 | 96.72 | 91.11 | 86.20 |
| 16 | HIA | -r 0.041 -x 300 -s 4 | 498 | 96.73 | 91.06 | 86.09 |

|    | Aligner | Options         | Time | %Aligned | %Unique | %Q10  |
|----|---------|-----------------|------|----------|---------|-------|
| 1  | BWA     | -k 1 -l 32 -o 1 | 547  | 85.16    | 81.27   | 81.14 |
| 2  | BWA     | -k 1 -l 32 -o 2 | 788  | 85.21    | 81.32   | 81.19 |
| 3  | BWA     | -k 1 -l 28 -o 1 | 683  | 85.32    | 81.40   | 81.27 |
| 4  | BWA     | -k 1 -l 32 -o 3 | 915  | 85.22    | 81.33   | 81.20 |
| 5  | BWA     | -k 1 -l 28 -o 2 | 958  | 85.37    | 81.45   | 81.32 |
| 6  | BWA     | -k 1 -l 24 -o 1 | 876  | 85.46    | 81.51   | 81.38 |
| 7  | BWA     | -k 1 -l 28 -o 3 | 1127 | 85.38    | 81.45   | 81.32 |
| 8  | BWA     | -k 1 -l 24 -o 2 | 1212 | 85.51    | 81.56   | 81.43 |
| 9  | BWA     | -k 1 -l 24 -o 3 | 1419 | 85.52    | 81.56   | 81.43 |
| 10 | BWA     | -k 2 -l 32 -o 1 | 1702 | 85.74    | 81.71   | 81.57 |
| 11 | BWA     | -k 2 -l 28 -o 1 | 1944 | 85.78    | 81.74   | 81.60 |
| 12 | BWA     | -k 2 -l 32 -o 2 | 2081 | 85.79    | 81.76   | 81.63 |
| 13 | BWA     | -k 2 -l 32 -o 3 | 2284 | 85.79    | 81.76   | 81.63 |
| 14 | BWA     | -k 2 -l 28 -o 2 | 2440 | 85.83    | 81.79   | 81.65 |
| 15 | BWA     | -k 2 -l 24 -o 1 | 2296 | 85.81    | 81.76   | 81.63 |
| 16 | BWA     | -k 2 -l 28 -o 3 | 2668 | 85.83    | 81.79   | 81.66 |
| 17 | BWA     | -k 2 -l 24 -o 2 | 2877 | 85.87    | 81.82   | 81.68 |
| 18 | BWA     | -k 2 -l 24 -o 3 | 3126 | 85.87    | 81.82   | 81.68 |

|   | Aligner | Options      | Time | %Aligned | %Unique | %Q10  |
|---|---------|--------------|------|----------|---------|-------|
| 1 | BWA MEM | -k 17 -r 1.3 | 272  | 96.86    | 89.32   | 86.85 |
| 2 | BWA MEM | -k 17 -r 1.5 | 272  | 96.84    | 89.32   | 86.86 |
| 3 | BWA MEM | -k 17 -r 1.7 | 247  | 96.82    | 89.40   | 86.93 |
| 4 | BWA MEM | -k 19 -r 1.3 | 229  | 96.71    | 89.21   | 86.76 |
| 5 | BWA MEM | -k 19 -r 1.5 | 224  | 96.69    | 89.27   | 86.81 |
| 6 | BWA MEM | -k 19 -r 1.7 | 212  | 96.68    | 89.36   | 86.88 |
| 7 | BWA MEM | -k 21 -r 1.3 | 217  | 96.46    | 89.07   | 86.64 |
| 8 | BWA MEM | -k 21 -r 1.5 | 204  | 96.44    | 89.15   | 86.72 |
| 9 | BWA MEM | -k 21 -r 1.7 | 191  | 96.44    | 89.27   | 86.84 |

|    | Aligner | Options                           | Time | %Aligned | %Unique | %Q10  |
|----|---------|-----------------------------------|------|----------|---------|-------|
| 1  | Bowtie2 | -D 5 -R 1 -N 0 -L 22 -i S,0,2.50  | 220  | 92.43    | 90.14   | 82.76 |
| 2  | Bowtie2 | -D 10 -R 2 -N 0 -L 22 -i S,0,2.50 | 306  | 93.21    | 90.82   | 83.06 |
| 3  | Bowtie2 | -D 15 -R 2 -N 0 -L 22 -i S,1,2.50 | 346  | 93.36    | 90.93   | 83.10 |
| 4  | Bowtie2 | -D 15 -R 2 -N 0 -L 22 -i S,1,2.20 | 346  | 93.44    | 91.01   | 83.14 |
| 5  | Bowtie2 | -D 15 -R 2 -N 0 -L 22 -i S,1,1.65 | 386  | 93.69    | 91.20   | 83.28 |
| 6  | Bowtie2 | -D 15 -R 2 -N 0 -L 22 -i S,1,1.15 | 439  | 94.05    | 91.49   | 83.45 |
| 7  | Bowtie2 | -D 15 -R 2 -N 0 -L 21 -i S,1,1.00 | 497  | 94.27    | 91.62   | 83.49 |
| 8  | Bowtie2 | -D 15 -R 2 -N 0 -L 20 -i S,1,0.75 | 636  | 94.56    | 91.80   | 83.59 |
| 9  | Bowtie2 | -D 15 -R 2 -N 0 -L 20 -i S,1,0.50 | 727  | 94.66    | 91.87   | 83.63 |
| 10 | Bowtie2 | -D 20 -R 3 -N 0 -L 20 -i S,1,0.50 | 999  | 94.85    | 92.04   | 83.68 |
| 11 | Bowtie2 | -D 25 -R 4 -N 0 -L 20 -i S,1,0.50 | 1291 | 94.96    | 92.11   | 83.69 |

|   | Aligner | Options          | Time | %Aligned | %Unique | %Q10 |
|---|---------|------------------|------|----------|---------|------|
| 1 | SOAP2   | -l 256 -v 3 -g 0 | 159  | 77.15    | 74.05   |      |
| 2 | SOAP2   | -l 256 -v 5 -g 0 | 155  | 77.15    | 74.05   |      |
| 3 | SOAP2   | -l 256 -v 7 -g 0 | 155  | 77.15    | 74.05   |      |
| 4 | SOAP2   | -l 75 -v 5 -g 0  | 194  | 84.35    | 80.51   |      |
| 5 | SOAP2   | -l 75 -v 7 -g 0  | 192  | 85.27    | 81.33   |      |
| 6 | SOAP2   | -l 75 -v 3 -g 0  | 202  | 82.24    | 78.60   |      |

|    |       |                 |      |       |       |  |
|----|-------|-----------------|------|-------|-------|--|
| 7  | SOAP2 | -l 40 -v 7 -g 0 | 283  | 87.29 | 82.29 |  |
| 8  | SOAP2 | -l 40 -v 5 -g 0 | 314  | 85.23 | 80.83 |  |
| 9  | SOAP2 | -l 40 -v 3 -g 0 | 367  | 81.77 | 78.07 |  |
| 10 | SOAP2 | -l 28-v 7 -g 0  | 1018 | 87.63 | 82.30 |  |
| 11 | SOAP2 | -l 28 -v 5 -g 0 | 1160 | 85.28 | 80.78 |  |
| 12 | SOAP2 | -l 28 -v 3 -g 0 | 1396 | 81.59 | 77.93 |  |

|   | Aligner | Options                               | Time | %Aligned | %Unique | %Q10  |
|---|---------|---------------------------------------|------|----------|---------|-------|
| 1 | SeqAlto | -f [Index mode: 0, k-mer_size: 28]    | 598  | 88.66    | 85.24   | 84.65 |
| 2 | SeqAlto | -a [Index mode: 0, k-mer_size: 28]    | 1461 | 88.72    | 85.08   | 84.46 |
| 3 | SeqAlto | -f -u [Index mode: 0, k-mer_size: 28] | 391  | 86.08    | 82.74   | 82.27 |
| 4 | SeqAlto | -a -u [Index mode: 0, k-mer_size: 28] | 455  | 86.19    | 82.64   | 82.14 |
| 5 | SeqAlto | -f [Index mode: 1, k-mer_size: 22]    | 382  | 88.78    | 85.23   | 84.63 |
| 6 | SeqAlto | -a [Index mode: 1, k-mer_size: 22]    | 1567 | 89.16    | 85.22   | 84.60 |
| 7 | SeqAlto | -f -u [Index mode: 1, k-mer_size: 22] | 128  | 86.15    | 82.71   | 82.22 |
| 8 | SeqAlto | -a -u [Index mode: 1, k-mer_size: 22] | 198  | 86.53    | 82.27   | 82.22 |

#### 454-like 400 bp (single-end)

|    | Aligner | Options              | Time | %Aligned | %Unique | %Q10  |
|----|---------|----------------------|------|----------|---------|-------|
| 1  | HIA     | -r 0.011 -x 50 -s 4  | 441  | 97.47    | 95.83   | 93.30 |
| 2  | HIA     | -r 0.011 -x 100 -s 4 | 453  | 99.05    | 95.88   | 93.27 |
| 3  | HIA     | -r 0.011 -x 200 -s 4 | 498  | 97.61    | 95.91   | 93.22 |
| 4  | HIA     | -r 0.011 -x 300 -s 4 | 528  | 97.64    | 95.93   | 93.20 |
| 5  | HIA     | -r 0.021 -x 50 -s 4  | 460  | 98.42    | 96.52   | 94.80 |
| 6  | HIA     | -r 0.021 -x 100 -s 4 | 546  | 98.48    | 96.56   | 94.78 |
| 7  | HIA     | -r 0.021 -x 200 -s 4 | 622  | 98.54    | 96.59   | 94.75 |
| 8  | HIA     | -r 0.021 -x 300 -s 4 | 693  | 98.56    | 96.60   | 94.72 |
| 9  | HIA     | -r 0.031 -x 50 -s 4  | 498  | 98.96    | 96.91   | 95.70 |
| 10 | HIA     | -r 0.031 -x 100 -s 4 | 597  | 98.97    | 96.90   | 95.67 |
| 11 | HIA     | -r 0.031 -x 200 -s 4 | 664  | 98.98    | 96.89   | 95.63 |
| 12 | HIA     | -r 0.031 -x 300 -s 4 | 815  | 98.98    | 96.88   | 95.61 |



|    |     |                      |     |       |       |       |
|----|-----|----------------------|-----|-------|-------|-------|
| 13 | HIA | -r 0.041 -x 50 -s 4  | 622 | 99.04 | 96.95 | 96.02 |
| 14 | HIA | -r 0.041 -x 100 -s 4 | 749 | 99.04 | 96.95 | 96.00 |
| 15 | HIA | -r 0.041 -x 200 -s 4 | 823 | 99.04 | 96.91 | 95.95 |
| 16 | HIA | -r 0.041 -x 300 -s 4 | 964 | 99.05 | 96.90 | 95.92 |

|   | Aligner | Options          | Time | %Aligned | %Unique | %Q10  |
|---|---------|------------------|------|----------|---------|-------|
| 1 | BWA-SW  | -c 5.5 -z 1 -s 1 | 2081 | 99.20    | 95.86   | 92.35 |
| 2 | BWA-SW  | -c 5.5 -z 1 -s 2 | 2708 | 99.23    | 95.97   | 92.55 |
| 3 | BWA-SW  | -c 5.5 -z 2 -s 1 | 2913 | 99.13    | 96.13   | 92.23 |
| 4 | BWA-SW  | -c 5.5 -z 1 -s 3 | 3328 | 99.20    | 96.01   | 92.64 |
| 5 | BWA-SW  | -c 5.5 -z 3 -s 1 | 3645 | 99.53    | 96.32   | 92.20 |
| 6 | BWA-SW  | -c 5.5 -z 2 -s 2 | 3947 | 99.48    | 96.27   | 92.50 |
| 7 | BWA-SW  | -c 5.5 -z 2 -s 3 | 5030 | 99.48    | 96.31   | 92.62 |
| 8 | BWA-SW  | -c 5.5 -z 3 -s 2 | 5039 | 99.53    | 96.44   | 92.51 |
| 9 | BWA-SW  | -c 5.5 -z 3 -s 3 | 6369 | 99.53    | 96.48   | 92.63 |

|   | Aligner | Options      | Time | %Aligned | %Unique | %Q10  |
|---|---------|--------------|------|----------|---------|-------|
| 1 | BWA MEM | -k 17 -r 1.3 | 851  | 99.73    | 96.35   | 94.85 |
| 2 | BWA MEM | -k 17 -r 1.5 | 830  | 99.73    | 96.36   | 94.86 |
| 3 | BWA MEM | -k 17 -r 1.7 | 802  | 99.72    | 96.40   | 94.90 |
| 4 | BWA MEM | -k 19 -r 1.3 | 742  | 99.72    | 96.36   | 94.87 |
| 5 | BWA MEM | -k 19 -r 1.5 | 739  | 99.72    | 96.38   | 94.89 |
| 6 | BWA MEM | -k 19 -r 1.7 | 718  | 99.72    | 96.42   | 94.92 |
| 7 | BWA MEM | -k 21 -r 1.3 | 708  | 99.71    | 96.38   | 94.90 |
| 8 | BWA MEM | -k 21 -r 1.5 | 704  | 99.70    | 96.42   | 94.93 |
| 9 | BWA MEM | -k 21 -r 1.7 | 685  | 99.70    | 96.47   | 94.97 |

|   | Aligner | Options                           | Time | %Aligned | %Unique | %Q10  |
|---|---------|-----------------------------------|------|----------|---------|-------|
| 1 | Bowtie2 | -D 5 -R 1 -N 0 -L 25 -i S,1,2.0   | 843  | 97.45    | 96.18   | 90.54 |
| 2 | Bowtie2 | -D 5 -R 1 -N 0 -L 22 -i S,1,2.50  | 900  | 97.00    | 95.66   | 89.96 |
| 3 | Bowtie2 | -D 10 -R 2 -N 0 -L 22 -i S,1,2.50 | 1380 | 97.75    | 96.47   | 90.72 |
| 4 | Bowtie2 | -D 10 -R 2 -N 0 -L 22 -i S,1,1.75 | 1615 | 97.97    | 96.65   | 90.88 |

|    |         |                                   |      |       |       |       |
|----|---------|-----------------------------------|------|-------|-------|-------|
| 5  | Bowtie2 | -D 15 -R 2 -N 0 -L 22 -i S,1,2.50 | 1736 | 97.85 | 96.57 | 90.78 |
| 6  | Bowtie2 | -D 15 -R 2 -N 0 -L 22 -i S,1,2.20 | 1799 | 97.93 | 96.64 | 90.83 |
| 7  | Bowtie2 | -D 15 -R 2 -N 0 -L 22 -i S,1,1.65 | 1980 | 98.08 | 96.74 | 90.93 |
| 8  | Bowtie2 | -D 15 -R 2 -N 0 -L 22 -i S,1,1.15 | 2217 | 98.18 | 96.81 | 90.97 |
| 9  | Bowtie2 | -D 15 -R 2 -N 0 -L 21 -i S,1,1.00 | 2463 | 98.21 | 96.83 | 90.97 |
| 10 | Bowtie2 | -D 15 -R 2 -N 0 -L 20 -i S,1,0.75 | 2941 | 98.22 | 96.83 | 90.97 |
| 11 | Bowtie2 | -D 15 -R 2 -N 0 -L 20 -i S,1,0.50 | 3363 | 98.24 | 96.84 | 91.01 |
| 12 | Bowtie2 | -D 20 -R 3 -N 0 -L 20 -i S,1,0.50 | 4860 | 98.33 | 96.92 | 91.02 |
| 13 | Bowtie2 | -D 25 -R 4 -N 0 -L 20 -i S,1,0.50 | 6597 | 98.37 | 96.96 | 91.02 |

### HiSeq 101bp×99 bp (paired-end) dataset

|    | Aligner | Options              | Time | %Aligned | %Unique | %Q10  |
|----|---------|----------------------|------|----------|---------|-------|
| 1  | HIA     | -r 0.011 -x 50 -s 4  | 419  | 82.84    | 79.81   | 78.64 |
| 2  | HIA     | -r 0.011 -x 100 -s 4 | 480  | 82.95    | 79.87   | 78.69 |
| 3  | HIA     | -r 0.011 -x 200 -s 4 | 596  | 83.01    | 79.89   | 78.70 |
| 4  | HIA     | -r 0.011 -x 300 -s 4 | 629  | 83.04    | 79.89   | 78.71 |
| 5  | HIA     | -r 0.021 -x 50 -s 4  | 466  | 87.27    | 83.92   | 82.40 |
| 6  | HIA     | -r 0.021 -x 100 -s 4 | 524  | 87.48    | 84.06   | 82.51 |
| 7  | HIA     | -r 0.021 -x 200 -s 4 | 643  | 87.62    | 84.15   | 82.55 |
| 8  | HIA     | -r 0.021 -x 300 -s 4 | 675  | 87.66    | 84.17   | 82.57 |
| 9  | HIA     | -r 0.031 -x 50 -s 4  | 684  | 89.78    | 86.10   | 84.06 |
| 10 | HIA     | -r 0.031 -x 100 -s 4 | 726  | 89.95    | 86.19   | 84.07 |
| 11 | HIA     | -r 0.031 -x 200 -s 4 | 822  | 90.16    | 86.31   | 84.08 |
| 12 | HIA     | -r 0.031 -x 300 -s 4 | 935  | 90.30    | 86.40   | 84.09 |
| 13 | HIA     | -r 0.041 -x 50 -s 4  | 734  | 90.93    | 87.13   | 85.24 |
| 14 | HIA     | -r 0.041 -x 100 -s 4 | 855  | 91.18    | 87.29   | 85.27 |
| 15 | HIA     | -r 0.041 -x 200 -s 4 | 1003 | 91.39    | 87.39   | 85.28 |
| 16 | HIA     | -r 0.041 -x 300 -s 4 | 1111 | 91.53    | 87.48   | 85.25 |

|   | Aligner | Options         | Time | %Aligned | %Unique | %Q10  |
|---|---------|-----------------|------|----------|---------|-------|
| 1 | BWA     | -k 1 -l 32 -o 1 | 557  | 88.38    | 86.19   | 85.90 |

|    |     |                 |      |       |       |       |
|----|-----|-----------------|------|-------|-------|-------|
| 2  | BWA | -k 1 -l 32 -o 2 | 761  | 88.41 | 86.21 | 85.93 |
| 3  | BWA | -k 1 -l 28 -o 1 | 682  | 88.50 | 86.29 | 85.98 |
| 4  | BWA | -k 1 -l 32 -o 3 | 913  | 88.41 | 86.22 | 85.93 |
| 5  | BWA | -k 1 -l 28 -o 2 | 954  | 88.53 | 86.31 | 86.01 |
| 6  | BWA | -k 1 -l 24 -o 1 | 875  | 88.62 | 86.37 | 86.07 |
| 7  | BWA | -k 1 -l 28 -o 3 | 1126 | 88.53 | 86.31 | 86.01 |
| 8  | BWA | -k 1 -l 24 -o 2 | 1209 | 88.65 | 86.40 | 86.09 |
| 9  | BWA | -k 1 -l 24 -o 3 | 1407 | 88.65 | 86.40 | 86.09 |
| 10 | BWA | -k 2 -l 32 -o 1 | 1651 | 88.65 | 86.52 | 86.20 |
| 11 | BWA | -k 2 -l 28 -o 1 | 1942 | 88.84 | 86.54 | 86.21 |
| 12 | BWA | -k 2 -l 32 -o 2 | 2076 | 88.85 | 86.55 | 86.22 |
| 13 | BWA | -k 2 -l 32 -o 3 | 2276 | 88.85 | 86.55 | 86.22 |
| 14 | BWA | -k 2 -l 28 -o 2 | 2430 | 88.87 | 86.57 | 86.24 |
| 15 | BWA | -k 2 -l 24 -o 1 | 2317 | 88.87 | 86.57 | 86.23 |
| 16 | BWA | -k 2 -l 28 -o 3 | 2672 | 88.88 | 86.56 | 86.24 |
| 17 | BWA | -k 2 -l 24 -o 2 | 2871 | 88.90 | 86.59 | 86.26 |
| 18 | BWA | -k 2 -l 24 -o 3 | 3130 | 88.90 | 86.59 | 86.26 |

|   | Aligner | Options      | Time | %Aligned | %Unique | %Q10  |
|---|---------|--------------|------|----------|---------|-------|
| 1 | BWA MEM | -k 17 -r 1.3 | 728  | 93.49    | 90.54   | 89.79 |
| 2 | BWA MEM | -k 17 -r 1.5 | 690  | 93.49    | 90.55   | 89.80 |
| 3 | BWA MEM | -k 17 -r 1.7 | 659  | 93.47    | 90.56   | 89.83 |
| 4 | BWA MEM | -k 19 -r 1.3 | 592  | 93.19    | 90.28   | 89.55 |
| 5 | BWA MEM | -k 19 -r 1.5 | 568  | 93.18    | 90.29   | 89.57 |
| 6 | BWA MEM | -k 19 -r 1.7 | 546  | 93.16    | 90.30   | 89.58 |
| 7 | BWA MEM | -k 21 -r 1.3 | 545  | 92.88    | 90.01   | 89.32 |
| 8 | BWA MEM | -k 21 -r 1.5 | 523  | 92.87    | 90.02   | 89.33 |
| 9 | BWA MEM | -k 21 -r 1.7 | 495  | 92.82    | 90.01   | 89.33 |

|   | Aligner | Options                           | Time | %Aligned | %Unique | %Q10  |
|---|---------|-----------------------------------|------|----------|---------|-------|
| 1 | Bowtie2 | -D 5 -R 1 -N 0 -L 22 -i S,0,2.50  | 530  | 91.03    | 90.08   | 84.44 |
| 2 | Bowtie2 | -D 10 -R 2 -N 0 -L 22 -i S,0,2.50 | 577  | 91.27    | 90.23   | 84.40 |

|    |         |                                   |      |       |       |       |
|----|---------|-----------------------------------|------|-------|-------|-------|
| 3  | Bowtie2 | -D 15 -R 2 -N 0 -L 22 -i S,1,2.50 | 654  | 91.42 | 90.31 | 84.38 |
| 4  | Bowtie2 | -D 15 -R 2 -N 0 -L 22 -i S,1,2.20 | 657  | 91.46 | 90.37 | 84.41 |
| 5  | Bowtie2 | -D 15 -R 2 -N 0 -L 22 -i S,1,1.65 | 704  | 91.82 | 90.62 | 84.53 |
| 6  | Bowtie2 | -D 15 -R 2 -N 0 -L 22 -i S,1,1.15 | 747  | 92.12 | 90.83 | 84.64 |
| 7  | Bowtie2 | -D 15 -R 2 -N 0 -L 21 -i S,1,1.00 | 845  | 92.32 | 90.99 | 84.70 |
| 8  | Bowtie2 | -D 15 -R 2 -N 0 -L 20 -i S,1,0.75 | 938  | 92.54 | 91.17 | 84.81 |
| 9  | Bowtie2 | -D 15 -R 2 -N 0 -L 20 -i S,1,0.50 | 1041 | 92.63 | 91.23 | 84.84 |
| 10 | Bowtie2 | -D 20 -R 3 -N 0 -L 20 -i S,1,0.50 | 1545 | 93.03 | 91.54 | 84.94 |
| 11 | Bowtie2 | -D 25 -R 4 -N 0 -L 20 -i S,1,0.50 | 1646 | 93.13 | 91.60 | 84.93 |

|    | Aligner | Options                        | Time | %Aligned | %Unique | %Q10 |
|----|---------|--------------------------------|------|----------|---------|------|
| 1  | SOAP2   | -l 256 -v 3 -g 0 -m 250 -x 500 | 297  | 64.30    | 62.62   |      |
| 2  | SOAP2   | -l 256 -v 5 -g 0 -m 250 -x 500 | 292  | 64.30    | 62.62   |      |
| 3  | SOAP2   | -l 256 -v 7 -g 0 -m 250 -x 500 | 292  | 64.30    | 62.62   |      |
| 4  | SOAP2   | -l 75 -v 7 -g 0 -m 250 -x 500  | 349  | 74.97    | 72.87   |      |
| 5  | SOAP2   | -l 75 -v 5 -g 0 -m 250 -x 500  | 349  | 73.64    | 71.58   |      |
| 6  | SOAP2   | -l 75 -v 3 -g 0 -m 250 -x 500  | 352  | 70.50    | 68.55   |      |
| 7  | SOAP2   | -l 75 -v 7 -g 3 -m 250 -x 500  | 427  | 81.45    | 79.06   |      |
| 8  | SOAP2   | -l 75 -v 5 -g 3 -m 250 -x 500  | 435  | 78.74    | 76.52   |      |
| 9  | SOAP2   | -l 256 -v 7 -g 3 -m 250 -x 500 | 431  | 79.30    | 77.12   |      |
| 10 | SOAP2   | -l 256 -v 5 -g 3 -m 250 -x 500 | 423  | 76.57    | 74.54   |      |
| 11 | SOAP2   | -l 75 -v 3 -g 3 -m 250 -x 500  | 447  | 74.10    | 72.09   |      |
| 12 | SOAP2   | -l 256 -v 3 -g 3 -m 250 -x 500 | 425  | 70.63    | 68.82   |      |
| 13 | SOAP2   | -l 40 -v 7 -g 0 -m 250 -x 500  | 613  | 76.38    | 74.08   |      |
| 14 | SOAP2   | -l 40 -v 5 -g 0 -m 250 -x 500  | 655  | 73.99    | 71.82   |      |
| 15 | SOAP2   | -l 40 -v 3 -g 0 -m 250 -x 500  | 726  | 69.64    | 67.70   |      |
| 16 | SOAP2   | -l 40 -v 7 -g 3 -m 250 -x 500  | 725  | 82.18    | 79.56   |      |
| 17 | SOAP2   | -l 40 -v 5 -g 3 -m 250 -x 500  | 751  | 78.92    | 76.58   |      |
| 18 | SOAP2   | -l 40 -v 3 -g 3 -m 250 -x 500  | 825  | 73.38    | 71.37   |      |
| 19 | SOAP2   | -l 28 -v 7 -g 0 -m 250 -x 500  | 2247 | 76.44    | 74.09   |      |
| 20 | SOAP2   | -l 28 -v 5 -g 0 -m 250 -x 500  | 2447 | 73.95    | 71.75   |      |
| 21 | SOAP2   | -l 28 -v 3 -g 0 -m 250 -x 500  | 2796 | 69.45    | 67.52   |      |

|    |       |                               |      |       |       |  |
|----|-------|-------------------------------|------|-------|-------|--|
| 22 | SOAP2 | -l 28 -v 7 -g 3 -m 250 -x 500 | 2390 | 82.24 | 79.53 |  |
| 23 | SOAP2 | -l 28 -v 5 -g 3 -m 250 -x 500 | 2554 | 78.88 | 76.50 |  |
| 24 | SOAP2 | -l 28 -v 3 -g 3 -m 250 -x 500 | 3342 | 73.20 | 71.20 |  |

|   | Aligner | Options                               | Time | %Aligned | %Unique | %Q10  |
|---|---------|---------------------------------------|------|----------|---------|-------|
| 1 | SeqAlto | -f [Index mode: 0, k-mer_size: 28]    | 1164 | 91.55    | 87.33   | 87.03 |
| 2 | SeqAlto | -a [Index mode: 0, k-mer_size: 28]    | 2873 | 91.66    | 87.48   | 87.18 |
| 3 | SeqAlto | -f -u [Index mode: 0, k-mer_size: 28] | 748  | 90.20    | 86.56   | 86.04 |
| 4 | SeqAlto | -a -u [Index mode: 0, k-mer_size: 28] | 748  | 90.20    | 86.56   | 86.04 |
| 5 | SeqAlto | -f [Index mode: 1, k-mer_size: 22]    | 967  | 91.82    | 87.55   | 87.28 |
| 6 | SeqAlto | -a [Index mode: 1, k-mer_size: 22]    | 3370 | 92.04    | 87.82   | 87.55 |
| 7 | SeqAlto | -f -u [Index mode: 1, k-mer_size: 22] | 460  | 90.29    | 86.59   | 86.07 |
| 8 | SeqAlto | -a -u [Index mode: 1, k-mer_size: 22] | 672  | 90.51    | 86.74   | 86.21 |
